# Supplementary material for: A monocarbocyclic sesterterpenoid biosynthetic precursor of leucosceptroids from Leucosceptrum canum and its metabolic isomerization by a specialist insect
Source: Royal Society of Chemistry journal article supplement (doi:10.1039/d2qo00138a), 2022-01-01

## Supporting Information for

### **A Monocarbocyclic Sesterterpenoid Biosynthetic Precursor of Leucosceptroids from *Leucoscepttrum canum* and Its Metabolic Isomerization by a Specialist Insect**

Kai Guo,<sup>a</sup> Shi-Hong Luo,<sup>b</sup> Da-Le Guo,<sup>a</sup> De-Sen Li,<sup>c</sup> Juan Hua,<sup>b</sup> Yan-Chun Liu,<sup>c</sup> Yan-Liu,<sup>a,c</sup> and Sheng-Hong Li<sup>\*,a,c</sup>

<sup>a</sup>State Key Laboratory of Southwestern Chinese Medicine Resources, and Innovative Institute of Chinese Medicine and Pharmacy, Chengdu University of Traditional Chinese Medicine, Chengdu 611137, P. R. China

<sup>b</sup>College of Bioscience and Biotechnology, Shenyang Agricultural University, Shenyang 110866, P. R. China

<sup>c</sup>State Key Laboratory of Phytochemistry and Plant Resources in West China, and Yunnan Key Laboratory of Natural Medicinal Chemistry, Kunming Institute of Botany, Chinese Academy of Sciences, Kunming 650201, P. R. China

\*Corresponding Author.

E-mail: [shli@cdutcm.edu.cn](mailto:shli@cdutcm.edu.cn).

## Table of Contents

|                                                                                                        |    |
|--------------------------------------------------------------------------------------------------------|----|
| Quantum chemical calculations .....                                                                    | 3  |
| Table S1. Optimized lowest energy 3D conformers and energy analysis for <b>1a</b> .....                | 4  |
| Table S2. Optimized lowest energy 3D conformers and energy analysis for <b>1b</b> .....                | 5  |
| Table S3. Optimized lowest energy 3D conformers and energy analysis for <b>2a</b> .....                | 6  |
| Table S4. Optimized lowest energy 3D conformers and energy analysis for <b>2b</b> .....                | 7  |
| Table S5. Calculated $^{13}\text{C}$ NMR results of <b>1a</b> and <b>1b</b> .....                      | 8  |
| Table S6. Calculated $^1\text{H}$ NMR results of <b>1a</b> and <b>1b</b> .....                         | 9  |
| Table S7. Calculated $^{13}\text{C}$ NMR results of <b>2a</b> and <b>2b</b> .....                      | 10 |
| Table S8. Calculated $^1\text{H}$ NMR results of <b>2a</b> and <b>2b</b> .....                         | 11 |
| Table S9. DP4+ evaluation of theoretical and experimental data of <b>1</b> .....                       | 12 |
| Table S10. DP4+ evaluation of theoretical and experimental data of <b>2</b> .....                      | 13 |
| Figure S1. Regression analysis of experimental vs calculated NMR data of <b>1a</b> and <b>1b</b> ..... | 14 |
| Figure S2. Regression analysis of experimental vs calculated NMR data of <b>2a</b> and <b>2b</b> ..... | 15 |
| Figure S3. HRESIMS of compound <b>1</b> .....                                                          | 16 |
| Figure S4. IR spectrum of compound <b>1</b> .....                                                      | 16 |
| Figure S5. $^1\text{H}$ NMR spectrum of compound <b>1</b> in $\text{CDCl}_3$ (400 MHz) .....           | 17 |
| Figure S6. Expanded $^1\text{H}$ NMR spectrum of compound <b>1</b> .....                               | 17 |
| Figure S7. $^{13}\text{C}$ NMR (DEPT) spectrum of compound <b>1</b> in $\text{CDCl}_3$ (100 MHz).....  | 18 |
| Figure S8. Expanded $^{13}\text{C}$ NMR (DEPT) spectrum of compound <b>1</b> .....                     | 18 |
| Figure S9. $^1\text{H}$ - $^1\text{H}$ COSY spectrum of compound <b>1</b> in $\text{CDCl}_3$ .....     | 19 |
| Figure S10. Expanded $^1\text{H}$ - $^1\text{H}$ COSY spectrum of compound <b>1</b> .....              | 19 |
| Figure S11. HSQC spectrum of compound <b>1</b> in $\text{CDCl}_3$ .....                                | 20 |
| Figure S12. Expanded HSQC spectrum of compound <b>1</b> .....                                          | 20 |
| Figure S13. HMBC spectrum of compound <b>1</b> in $\text{CDCl}_3$ .....                                | 21 |
| Figure S14. Expanded HMBC spectrum of compound <b>1</b> .....                                          | 21 |
| Figure S15. ROESY spectrum of compound <b>1</b> in $\text{CDCl}_3$ .....                               | 22 |
| Figure S16. Expanded ROESY spectrum of compound <b>1</b> .....                                         | 22 |
| Figure S17. HRESIMS of compound <b>2</b> .....                                                         | 23 |
| Figure S18. IR spectrum of compound <b>2</b> .....                                                     | 24 |
| Figure S19. $^1\text{H}$ NMR spectrum of compound <b>2</b> in acetone- $d_6$ (800 MHz) .....           | 25 |
| Figure S20. Expanded $^1\text{H}$ NMR spectrum of compound <b>2</b> .....                              | 25 |
| Figure S21. $^{13}\text{C}$ NMR (DEPT) spectrum of compound <b>2</b> in acetone- $d_6$ (200 MHz).....  | 26 |
| Figure S22. Expanded $^{13}\text{C}$ NMR (DEPT) spectrum of compound <b>2</b> .....                    | 26 |
| Figure S23. $^1\text{H}$ - $^1\text{H}$ COSY spectrum of compound <b>2</b> in acetone- $d_6$ .....     | 27 |
| Figure S24. Expanded $^1\text{H}$ - $^1\text{H}$ COSY spectrum of compound <b>2</b> .....              | 27 |
| Figure S25. HSQC spectrum of compound <b>2</b> in acetone- $d_6$ .....                                 | 28 |
| Figure S26. Expanded HSQC spectrum of compound <b>2</b> .....                                          | 28 |
| Figure S27. HMBC spectrum of compound <b>2</b> in acetone- $d_6$ .....                                 | 29 |
| Figure S28. Expanded HMBC spectrum of compound <b>2</b> .....                                          | 29 |
| Figure S29. ROESY spectrum of compound <b>2</b> in acetone- $d_6$ .....                                | 30 |
| Figure S30. Expanded ROESY spectrum of compound <b>2</b> .....                                         | 30 |

## Quantum chemical calculations

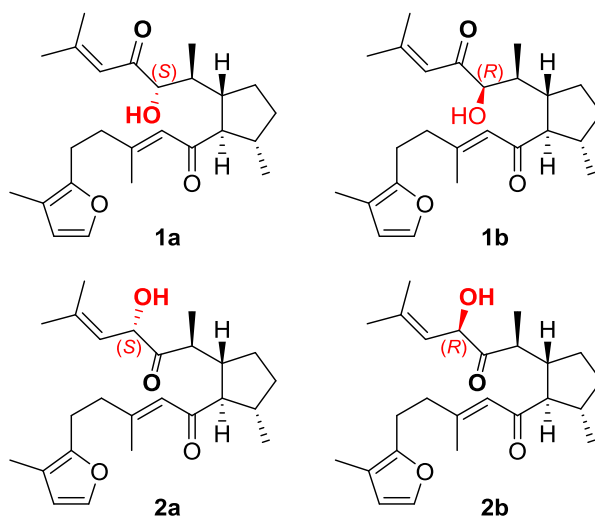

Conformational analyses of the structures (**1a**, **1b**, **2a**, and **2b**) were carried out via Monte Carlo searching using molecular mechanism with MMFF force field in the Spartan 18 program.<sup>1</sup> The force field minimum energy conformers thus obtained were subsequently optimized by applying the density functional theory (DFT) with the B3LYP/6-31G (d) level in vacuum, implemented in the Gaussian 09 software package.<sup>2</sup> Harmonic vibrational frequencies were also performed to confirm no imaginary frequencies of the finally optimized conformers. Gauge independent atomic orbital (GIAO) calculations of NMR chemical shifts were accomplished by DFT at the mPW1PW91/6-311+G (d,p) level in acetone or chloroform with the polarizable continuum model (PCM) in Gaussian 09 software. NMR chemical shifts of TMS were calculated in the same level and used as the references. The experimental and calculated data were analyzed by the improved probability DP4+ method for isomeric compounds. Regression analysis of calculated versus experimental NMR chemical shifts of **1** and **2** were carried out. ECD calculations further were conducted at the B3LYP/6-31G (d) level with the PCM in MeOH. The program SpecDis 1.64 was used for comparisons of the calculated curves and experimental CD spectra.

## References

1. Spartan 18; Wavefunction Inc.:Irvine, CA.
2. Gaussian 09, Revision A.1, Frisch, M. J.; Trucks, G. W.; Schlegel, H. B.; Scuseria, G. E.; Robb, M. A.; Cheeseman, J. R.; Scalmani, G.; Barone, V.; Mennucci, B.; Petersson, G. A.; Nakatsuji, H.; Caricato, M.; Li, X.; Hratchian, H. P.; Izmaylov, A. F.; Bloino, J.; Zheng, G.; Sonnenberg, J. L.; Hada, M.; Ehara, M.; Toyota, K.; Fukuda, R.; Hasegawa, J.; Ishida, M.; Nakajima, T.; Honda, Y.; Kitao, O.; Nakai, H.; Vreven, T.; Montgomery, Jr., J. A.; Peralta, J. E.; Ogliaro, F.; Bearpark, M.; Heyd, J. J.; Brothers, E.; Kudin, K. N.; Staroverov, V. N.; Kobayashi, R.; Normand, J.; Raghavachari, K.; Rendell, A.; Burant, J. C.; Iyengar, S. S.; Tomasi, J.; Cossi, M.; Rega, N.; Millam, J. M.; Klene, M.; Knox, J. E.; Cross, J. B.; Bakken, V.; Adamo, C.; Jaramillo, J.; Gomperts, R.; Stratmann, R. E.; Yazyev, O.; Austin, A. J.; Cammi, R.; Pomelli, C.; Ochterski, J. W.; Martin, R. L.; Morokuma, K.; Zakrzewski, V. G.; Voth, G. A.; Salvador, P.; Dannenberg, J. J.; Dapprich, S.; Daniels, A. D.; Farkas, Ö.; Foresman, J. B.; Ortiz, J. V.; Cioslowski, J.; Fox, D. J. Gaussian, Inc., Wallingford CT, 2009.

**Table S1.** Optimized lowest energy 3D conformers and energy analysis for **1a**

| Conformers  |                                                                                     | Free energies |                      |              |
|-------------|-------------------------------------------------------------------------------------|---------------|----------------------|--------------|
| No.         | 3D conformers                                                                       | E (Hartree)   | $\Delta E$ (Hartree) | Distribution |
| <b>1a-1</b> | 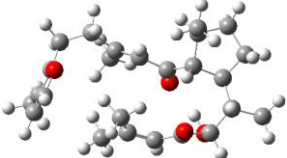   | -1274.442300  | 0.001091             | 8.54%        |
| <b>1a-2</b> |    | -1274.442067  | 0.001324             | 6.67%        |
| <b>1a-3</b> |    | -1274.442074  | 0.001317             | 6.72%        |
| <b>1a-4</b> |   | -1274.443391  | 0                    | 27.10%       |
| <b>1a-5</b> |  | -1274.443158  | 0.000233             | 21.17%       |
| <b>1a-6</b> |  | -1274.443222  | 0.000169             | 22.66%       |
| <b>1a-7</b> |  | -1274.442131  | 0.00126              | 7.14%        |

**Table S2.** Optimized lowest energy 3D conformers and energy analysis for **1b**

| Conformers  |                                                                                     | Free energies |                      |              |
|-------------|-------------------------------------------------------------------------------------|---------------|----------------------|--------------|
| No.         | 3D conformers                                                                       | E (Hartree)   | $\Delta E$ (Hartree) | Distribution |
| <b>1b-1</b> | 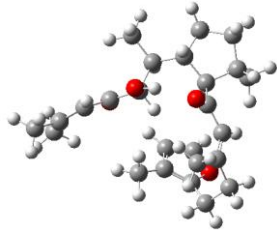   | -1274.446947  | 0                    | 26.26%       |
| <b>1b-2</b> |    | -1274.446889  | 0.000058             | 24.70%       |
| <b>1b-3</b> |   | -1274.446926  | 0.000021             | 25.69%       |
| <b>1b-4</b> |  | -1274.446836  | 0.000111             | 23.35%       |

**Table S3.** Optimized lowest energy 3D conformers and energy analysis for **2a**

| Conformers  |                                                                                     | Free energies |                      |              |
|-------------|-------------------------------------------------------------------------------------|---------------|----------------------|--------------|
| No.         | 3D conformers                                                                       | E (Hartree)   | $\Delta E$ (Hartree) | Distribution |
| <b>2a-1</b> | 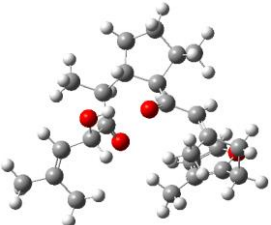   | -1274.442749  | 0.000447             | 26.76%       |
| <b>2a-2</b> |    | -1274.442635  | 0.000561             | 23.71%       |
| <b>2a-3</b> |   | -1274.443196  | 0                    | 42.95%       |
| <b>2a-4</b> |  | -1274.441424  | 0.001772             | 6.58%        |

**Table S4.** Optimized lowest energy 3D conformers and energy analysis for **2b**

| Conformers |                                                                                     | Free energies |                      |              |
|------------|-------------------------------------------------------------------------------------|---------------|----------------------|--------------|
| No.        | 3D conformers                                                                       | E (Hartree)   | $\Delta E$ (Hartree) | Distribution |
| 2b-1       | 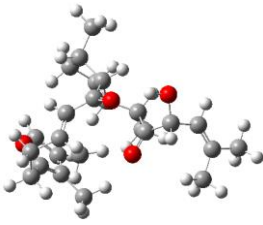   | -1274.447744  | 0.001043             | 16.49%       |
| 2b-2       |    | -1274.447663  | 0.001124             | 15.14%       |
| 2b-3       |   | -1274.447859  | 0.000928             | 18.63%       |
| 2b-4       |  | -1274.448787  | 0                    | 49.75%       |

**Table S5.** Calculated  $^{13}\text{C}$  NMR results of **1a** and **1b**

| No.  | Experimental<br>NMR data | <b>1a</b>         |                 |               | <b>1b</b>         |                 |               |
|------|--------------------------|-------------------|-----------------|---------------|-------------------|-----------------|---------------|
|      |                          | Shielding tensors | Unscaled shifts | Scaled shifts | Shielding tensors | Unscaled shifts | Scaled shifts |
| C-1  | 28.0                     | 156.2816273       | 32.4            | 27.8          | 156.6900849       | 32.0            | 28.1          |
| C-2  | 159.7                    | 16.32415205       | 172.3           | 161.7         | 14.18655403       | 174.5           | 164.2         |
| C-3  | 119.1                    | 61.73268613       | 126.9           | 118.3         | 62.77780852       | 125.9           | 117.8         |
| C-4  | 201.2                    | -28.08088168      | 216.7           | 204.2         | -24.23704768      | 212.9           | 200.9         |
| C-5  | 78.2                     | 100.9102812       | 87.7            | 80.8          | 105.1828442       | 83.5            | 77.3          |
| C-6  | 36.7                     | 143.9709574       | 44.7            | 39.6          | 140.9544294       | 47.7            | 43.1          |
| C-7  | 46.6                     | 145.6178087       | 43.0            | 38.1          | 142.5111286       | 46.1            | 41.6          |
| C-8  | 30.7                     | 153.4232475       | 35.2            | 30.6          | 154.4298642       | 34.2            | 30.2          |
| C-9  | 33.5                     | 153.0980953       | 35.5            | 30.9          | 151.9006352       | 36.7            | 32.6          |
| C-10 | 39.4                     | 144.3914754       | 44.3            | 39.2          | 146.0185257       | 42.6            | 38.3          |
| C-11 | 60.3                     | 120.7866662       | 67.9            | 61.8          | 121.7540273       | 66.9            | 61.4          |
| C-12 | 205.1                    | -26.14561454      | 214.8           | 202.4         | -25.27713834      | 213.9           | 201.9         |
| C-13 | 125.4                    | 59.15919644       | 129.5           | 120.8         | 57.25915889       | 131.4           | 123.0         |
| C-14 | 156.6                    | 13.61830319       | 175.0           | 164.3         | 15.81736161       | 172.8           | 162.6         |
| C-15 | 39.6                     | 142.8202272       | 45.8            | 40.7          | 144.8997731       | 43.7            | 39.3          |
| C-16 | 24.2                     | 160.6074333       | 28.0            | 23.7          | 160.9163251       | 27.7            | 24.0          |
| C-17 | 149.4                    | 32.23716066       | 156.4           | 146.5         | 32.32436029       | 156.3           | 146.9         |
| C-18 | 114.4                    | 65.89051623       | 122.8           | 114.3         | 63.53858359       | 125.1           | 117.0         |
| C-19 | 112.7                    | 68.9920718        | 119.7           | 111.3         | 68.30020865       | 120.3           | 112.5         |
| C-20 | 140.0                    | 41.41729064       | 147.2           | 137.7         | 41.6854432        | 147.0           | 137.9         |
| C-21 | 21.4                     | 163.0973111       | 25.5            | 21.3          | 162.6403655       | 26.0            | 22.4          |
| C-22 | 12.5                     | 166.8394561       | 21.8            | 17.8          | 174.0824077       | 14.6            | 11.4          |
| C-23 | 22.5                     | 162.5193349       | 26.1            | 21.9          | 162.7627815       | 25.9            | 22.3          |
| C-24 | 19.0                     | 163.0932188       | 25.6            | 21.3          | 165.1666274       | 23.5            | 20.0          |
| C-25 | 9.7                      | 176.1975907       | 12.4            | 8.8           | 176.4145666       | 12.2            | 9.2           |



**Table S6.** Calculated  $^1\text{H}$  NMR results of **1a** and **1b**

| No.  | Experimental<br>NMR data | <b>1a</b>         |                 |               | <b>1b</b>         |                 |               |
|------|--------------------------|-------------------|-----------------|---------------|-------------------|-----------------|---------------|
|      |                          | Shielding tensors | Unscaled shifts | Scaled shifts | Shielding tensors | Unscaled shifts | Scaled shifts |
| H-1  | 1.95                     | 30.02532713       | 1.85            | 1.87          | 29.73423314       | 2.14            | 2.20          |
| H-3  | 6.12                     | 24.68294546       | 7.19            | 6.76          | 24.37422371       | 7.50            | 7.03          |
| H-5  | 4.22                     | 28.17199046       | 3.70            | 3.57          | 28.56271717       | 3.31            | 3.26          |
| H-6  | 2.23                     | 29.4645495        | 2.41            | 2.38          | 29.9657403        | 1.90            | 1.99          |
| H-7  | 2.26                     | 29.56779798       | 2.30            | 2.29          | 29.55842549       | 2.31            | 2.36          |
| H-8a | 2.03                     | 30.04683697       | 1.82            | 1.85          | 30.05872335       | 1.81            | 1.91          |
| H-8b | 1.79                     | 30.35301084       | 1.52            | 1.57          | 30.41049709       | 1.46            | 1.59          |
| H-9a | 2.02                     | 30.36755276       | 1.50            | 1.55          | 30.17802569       | 1.69            | 1.80          |
| H-9b | 1.28                     | 30.61278334       | 1.26            | 1.33          | 30.48310291       | 1.39            | 1.53          |
| H-10 | 2.12                     | 30.08310433       | 1.79            | 1.81          | 29.9500247        | 1.92            | 2.01          |
| H-11 | 2.59                     | 29.62599267       | 2.24            | 2.23          | 29.77874264       | 2.09            | 2.16          |
| H-13 | 5.99                     | 25.52036167       | 6.35            | 6.00          | 25.84748517       | 6.02            | 5.70          |
| H-15 | 2.41                     | 29.27296813       | 2.60            | 2.56          | 29.3903498        | 2.48            | 2.51          |
| H-16 | 2.73                     | 29.02442697       | 2.85            | 2.78          | 28.94028929       | 2.93            | 2.92          |
| H-19 | 6.12                     | 25.30119823       | 6.57            | 6.20          | 24.87662626       | 6.99            | 6.58          |
| H-20 | 7.19                     | 24.29252131       | 7.58            | 7.12          | 24.29049709       | 7.58            | 7.11          |
| H-21 | 2.2                      | 29.82801553       | 2.04            | 2.05          | 29.53652425       | 2.33            | 2.38          |
| H-22 | 0.51                     | 1.14512628        | 1.15            | 1.22          | 31.06564552       | 0.80            | 1.00          |
| H-23 | 1.05                     | 1.136635943       | 1.14            | 1.22          | 30.66329053       | 1.21            | 1.37          |
| H-24 | 2.11                     | 2.314735776       | 2.31            | 2.30          | 29.73369655       | 2.14            | 2.20          |
| H-25 | 1.92                     | 29.77124277       | 2.10            | 2.10          | 30.38485997       | 1.49            | 1.62          |
| 5-OH | 3.68                     | 27.93003659       | 3.94            | 3.79          | 28.54311346       | 3.33            | 3.28          |

**Table S7.** Calculated  $^{13}\text{C}$  NMR results of **2a** and **2b**

| No.  | Experimental<br>NMR data | <b>2a</b>         |                 |               | <b>2b</b>         |                 |               |
|------|--------------------------|-------------------|-----------------|---------------|-------------------|-----------------|---------------|
|      |                          | Shielding tensors | Unscaled shifts | Scaled shifts | Shielding tensors | Unscaled shifts | Scaled shifts |
| C-1  | 25.9                     | 160.0284043       | 28.2            | 24.9          | 160.1099391       | 28.2            | 25.3          |
| C-2  | 138.8                    | 39.12503076       | 149.1           | 140.1         | 37.97926586       | 150.3           | 141.5         |
| C-3  | 122.8                    | 58.1905415        | 130.1           | 122.0         | 58.51370351       | 129.8           | 122.0         |
| C-4  | 76.7                     | 108.5413678       | 79.7            | 74.0          | 108.5111136       | 79.8            | 74.4          |
| C-5  | 214.7                    | -41.28291441      | 229.6           | 216.7         | -37.75147553      | 226.0           | 213.5         |
| C-6  | 42.3                     | 129.130983        | 59.1            | 54.4          | 136.9255263       | 51.3            | 47.4          |
| C-7  | 48.4                     | 138.0686393       | 50.2            | 45.9          | 136.2220314       | 52.1            | 48.1          |
| C-8  | 31.3                     | 152.9293104       | 35.3            | 31.7          | 154.6324782       | 33.6            | 30.5          |
| C-9  | 34.5                     | 152.6893126       | 35.6            | 31.9          | 152.0600983       | 36.2            | 33.0          |
| C-10 | 39.3                     | 144.0537074       | 44.2            | 40.2          | 145.1376664       | 43.1            | 39.6          |
| C-11 | 60.8                     | 122.2181298       | 66.1            | 61.0          | 118.9886307       | 69.3            | 64.4          |
| C-12 | 204                      | -25.67658828      | 214.0           | 201.8         | -29.24740981      | 217.5           | 205.4         |
| C-13 | 126.1                    | 57.96610023       | 130.3           | 122.2         | 58.60524591       | 129.7           | 121.9         |
| C-14 | 157.5                    | 12.17593463       | 176.1           | 165.8         | 15.36083965       | 172.9           | 163.0         |
| C-15 | 40.1                     | 142.9611266       | 45.3            | 41.2          | 146.1780017       | 42.1            | 38.6          |
| C-16 | 24.8                     | 161.0961189       | 27.2            | 23.9          | 160.9544267       | 27.3            | 24.5          |
| C-17 | 150.4                    | 32.64783651       | 155.6           | 146.3         | 32.33929868       | 155.9           | 146.9         |
| C-18 | 115.2                    | 62.75064096       | 125.5           | 117.6         | 62.75926485       | 125.5           | 117.9         |
| C-19 | 113.6                    | 69.12356913       | 119.2           | 111.5         | 68.14882661       | 120.1           | 112.8         |
| C-20 | 141                      | 41.06253471       | 147.2           | 138.3         | 41.6206935        | 146.7           | 138.0         |
| C-21 | 18.9                     | 166.9213448       | 21.4            | 18.4          | 167.3286511       | 20.9            | 18.5          |
| C-22 | 17.6                     | 172.1477836       | 16.1            | 13.4          | 167.4349106       | 20.8            | 18.4          |
| C-23 | 22.3                     | 163.6001085       | 24.7            | 21.5          | 164.7683747       | 23.5            | 20.9          |
| C-24 | 19.1                     | 163.7260865       | 24.5            | 21.4          | 166.3524244       | 21.9            | 19.4          |
| C-25 | 9.8                      | 175.8836038       | 12.4            | 9.8           | 176.2379502       | 12.0            | 10.0          |

**Table S8.** Calculated  $^1\text{H}$  NMR results of **2a** and **2b**

| No.  | Experimental<br>NMR data | <b>2a</b>         |                 |               | <b>2b</b>         |                 |               |
|------|--------------------------|-------------------|-----------------|---------------|-------------------|-----------------|---------------|
|      |                          | Shielding tensors | Unscaled shifts | Scaled shifts | Shielding tensors | Unscaled shifts | Scaled shifts |
| H-1  | 1.76                     | 29.97555121       | 2.25            | 1.85          | 29.96554458       | 2.26            | 1.94          |
| H-3  | 4.95                     | 26.8212665        | 5.41            | 4.90          | 26.39887444       | 5.83            | 5.31          |
| H-4  | 4.78                     | 26.96415464       | 5.27            | 4.76          | 27.04675202       | 5.18            | 4.69          |
| H-6  | 2.99                     | 29.82865625       | 2.40            | 1.99          | 29.2084563        | 3.02            | 2.65          |
| H-7  | 2.17                     | 29.28421207       | 2.95            | 2.52          | 30.25104934       | 1.98            | 1.67          |
| H-8a | 1.65                     | 29.89293374       | 2.34            | 1.93          | 29.99029404       | 2.24            | 1.91          |
| H-8b | 1.54                     | 30.51088818       | 1.72            | 1.33          | 30.60161252       | 1.63            | 1.34          |
| H-9a | 1.94                     | 30.18988603       | 2.04            | 1.65          | 30.09325574       | 2.14            | 1.82          |
| H-9b | 1.15                     | 30.51728952       | 1.71            | 1.33          | 30.54749232       | 1.68            | 1.39          |
| H-10 | 2.07                     | 29.96908641       | 2.26            | 1.86          | 29.85561437       | 2.37            | 2.04          |
| H-11 | 2.71                     | 29.6364116        | 2.59            | 2.18          | 29.97086281       | 2.26            | 1.93          |
| H-13 | 6.12                     | 25.86169763       | 6.37            | 5.83          | 25.85630073       | 6.37            | 5.82          |
| H-15 | 2.45                     | 29.30349743       | 2.93            | 2.50          | 29.25747892       | 2.97            | 2.61          |
| H-16 | 2.8                      | 28.88090053       | 3.35            | 2.91          | 28.87897759       | 3.35            | 2.96          |
| H-19 | 6.18                     | 25.17955187       | 7.05            | 6.49          | 25.28053609       | 6.95            | 6.36          |
| H-20 | 7.31                     | 24.16212957       | 8.07            | 7.47          | 24.19536042       | 8.03            | 7.39          |
| H-21 | 1.87                     | 30.03232105       | 2.20            | 1.80          | 30.08875019       | 2.14            | 1.82          |
| H-22 | 0.89                     | 30.54475617       | 1.69            | 1.30          | 30.8352645        | 1.39            | 1.12          |
| H-23 | 1.04                     | 30.79280381       | 1.44            | 1.06          | 30.96025812       | 1.27            | 1.00          |
| H-24 | 2.13                     | 29.53713965       | 2.69            | 2.28          | 29.77271269       | 2.46            | 2.12          |
| H-25 | 1.93                     | 29.85826124       | 2.37            | 1.97          | 29.58138468       | 2.65            | 2.30          |
| 4-OH | 4.04                     | 27.19152935       | 5.04            | 4.54          | 27.48573831       | 4.74            | 4.28          |

**Table S9.** DP4+ evaluation of theoretical and experimental data of **1**

| Functional |      | Solvent?     |          | Basis Set    |          | Type of Data      |          |
|------------|------|--------------|----------|--------------|----------|-------------------|----------|
| mPW1PW91   |      | PCM          |          | 6-311+G(d,p) |          | Shielding Tensors |          |
|            |      | DP4+         | 0.00%    | 100.00%      | -        | -                 | -        |
| Nuclei     | sp2? | Experimental | Isomer 1 | Isomer 2     | Isomer 3 | Isomer 4          | Isomer 5 |
| C          |      | 28           | 156.3    | 156.7        |          |                   |          |
| C          | x    | 159.7        | 16.3     | 14.2         |          |                   |          |
| C          | x    | 119.1        | 61.7     | 62.8         |          |                   |          |
| C          | x    | 201.2        | -28.1    | -24.2        |          |                   |          |
| C          |      | 78.2         | 100.9    | 105.2        |          |                   |          |
| C          |      | 36.7         | 144.0    | 141.0        |          |                   |          |
| C          |      | 46.6         | 145.6    | 142.5        |          |                   |          |
| C          |      | 30.7         | 153.4    | 154.4        |          |                   |          |
| C          |      | 33.5         | 153.1    | 151.9        |          |                   |          |
| C          |      | 39.4         | 144.4    | 146.0        |          |                   |          |
| C          |      | 60.3         | 120.8    | 121.8        |          |                   |          |
| C          | x    | 205.1        | -26.15   | -25.28       |          |                   |          |
| C          | x    | 125.4        | 59.16    | 57.26        |          |                   |          |
| C          | x    | 156.6        | 13.62    | 15.82        |          |                   |          |
| C          |      | 39.6         | 142.82   | 144.90       |          |                   |          |
| C          |      | 24.2         | 160.61   | 160.92       |          |                   |          |
| C          | x    | 149.4        | 32.24    | 32.32        |          |                   |          |
| C          | x    | 114.4        | 65.89    | 63.54        |          |                   |          |
| C          | x    | 112.7        | 68.99    | 68.30        |          |                   |          |
| C          | x    | 140          | 41.42    | 41.69        |          |                   |          |
| C          |      | 21.4         | 163.10   | 162.64       |          |                   |          |
| C          |      | 12.5         | 166.84   | 174.08       |          |                   |          |
| C          |      | 22.5         | 162.52   | 162.76       |          |                   |          |
| C          |      | 19           | 163.09   | 165.17       |          |                   |          |
| C          |      | 9.7          | 176.20   | 176.41       |          |                   |          |
| H          |      | 1.95         | 30.03    | 29.73        |          |                   |          |
| H          | x    | 6.12         | 24.68    | 24.37        |          |                   |          |
| H          |      | 4.22         | 28.17    | 28.56        |          |                   |          |
| H          |      | 2.23         | 29.46    | 29.97        |          |                   |          |
| H          |      | 2.26         | 29.57    | 29.56        |          |                   |          |
| H          |      | 2.03         | 30.05    | 30.06        |          |                   |          |
| H          |      | 1.79         | 30.35    | 30.41        |          |                   |          |
| H          |      | 2.02         | 30.37    | 30.18        |          |                   |          |
| H          |      | 1.28         | 30.61    | 30.48        |          |                   |          |
| H          |      | 2.12         | 30.08    | 29.95        |          |                   |          |
| H          |      | 2.59         | 29.63    | 29.78        |          |                   |          |
| H          | x    | 5.99         | 25.52    | 25.85        |          |                   |          |
| H          |      | 2.41         | 29.27    | 29.39        |          |                   |          |
| H          |      | 2.73         | 29.02    | 28.94        |          |                   |          |
| H          | x    | 6.12         | 25.30    | 24.88        |          |                   |          |
| H          | x    | 7.19         | 24.29    | 24.29        |          |                   |          |
| H          |      | 2.2          | 29.83    | 29.54        |          |                   |          |
| H          |      | 0.51         | 1.15     | 31.07        |          |                   |          |
| H          |      | 1.05         | 1.14     | 30.66        |          |                   |          |
| H          |      | 2.11         | 2.31     | 29.73        |          |                   |          |
| H          |      | 1.92         | 29.77    | 30.38        |          |                   |          |
| H          |      | 3.68         | 27.93    | 28.54        |          |                   |          |

| Functional       |       | Solvent? |          | Basis Set    |          | Type of Data      |          |
|------------------|-------|----------|----------|--------------|----------|-------------------|----------|
| mPW1PW91         |       | PCM      |          | 6-311+G(d,p) |          | Shielding Tensors |          |
|                  |       | Isomer 1 | Isomer 2 | Isomer 3     | Isomer 4 | Isomer 5          | Isomer 6 |
| sDP4+ (H data)   | 0.00% | 100.00%  | -        | -            | -        | -                 |          |
| sDP4+ (C data)   | 0.01% | 99.99%   | -        | -            | -        | -                 |          |
| sDP4+ (all data) | 0.00% | 100.00%  | -        | -            | -        | -                 |          |
| uDP4+ (H data)   | 0.00% | 100.00%  | -        | -            | -        | -                 |          |
| uDP4+ (C data)   | 0.00% | 100.00%  | -        | -            | -        | -                 |          |
| uDP4+ (all data) | 0.00% | 100.00%  | -        | -            | -        | -                 |          |
| DP4+ (H data)    | 0.00% | 100.00%  | -        | -            | -        | -                 |          |
| DP4+ (C data)    | 0.00% | 100.00%  | -        | -            | -        | -                 |          |
| DP4+ (all data)  | 0.00% | 100.00%  | -        | -            | -        | -                 |          |

**Table S10.** DP4+ evaluation of theoretical and experimental data of 2

| Functional<br>mPW1PW91 |      | Solvent?<br>PCM |          | Basis Set<br>6-311+G(d,p) |          |          | Type of Data<br>Shielding Tensors |  |
|------------------------|------|-----------------|----------|---------------------------|----------|----------|-----------------------------------|--|
|                        |      | DP4+            | 0.00%    | 100.00%                   | -        | -        | -                                 |  |
| Nuclei                 | sp2? | experimental    | Isomer 1 | Isomer 2                  | Isomer 3 | Isomer 4 | Isomer 5                          |  |
| C                      |      | 25.9            | 160.0    | 160.1                     |          |          |                                   |  |
| C                      | x    | 138.8           | 39.1     | 38.0                      |          |          |                                   |  |
| C                      | x    | 122.8           | 58.2     | 58.5                      |          |          |                                   |  |
| C                      |      | 76.7            | 108.5    | 108.5                     |          |          |                                   |  |
| C                      | x    | 214.7           | -41.3    | -37.8                     |          |          |                                   |  |
| C                      |      | 42.3            | 129.1    | 136.9                     |          |          |                                   |  |
| C                      |      | 48.4            | 138.1    | 136.2                     |          |          |                                   |  |
| C                      |      | 31.3            | 152.9    | 154.6                     |          |          |                                   |  |
| C                      |      | 34.5            | 152.7    | 152.1                     |          |          |                                   |  |
| C                      |      | 39.3            | 144.1    | 145.1                     |          |          |                                   |  |
| C                      |      | 60.8            | 122.2    | 119.0                     |          |          |                                   |  |
| C                      | x    | 204             | -25.68   | -29.25                    |          |          |                                   |  |
| C                      | x    | 126.1           | 57.97    | 58.61                     |          |          |                                   |  |
| C                      | x    | 157.5           | 12.18    | 15.36                     |          |          |                                   |  |
| C                      |      | 40.1            | 142.96   | 146.18                    |          |          |                                   |  |
| C                      |      | 24.8            | 161.10   | 160.95                    |          |          |                                   |  |
| C                      | x    | 150.4           | 32.65    | 32.34                     |          |          |                                   |  |
| C                      | x    | 115.2           | 62.75    | 62.76                     |          |          |                                   |  |
| C                      | x    | 113.6           | 69.12    | 68.15                     |          |          |                                   |  |
| C                      | x    | 141             | 41.06    | 41.62                     |          |          |                                   |  |
| C                      |      | 18.9            | 166.92   | 167.33                    |          |          |                                   |  |
| C                      |      | 17.6            | 172.15   | 167.43                    |          |          |                                   |  |
| C                      |      | 22.3            | 163.60   | 164.77                    |          |          |                                   |  |
| C                      |      | 19.1            | 163.73   | 166.35                    |          |          |                                   |  |
| C                      |      | 9.8             | 175.88   | 176.24                    |          |          |                                   |  |
| H                      |      | 1.76            | 29.98    | 29.97                     |          |          |                                   |  |
| H                      | x    | 4.95            | 26.82    | 26.40                     |          |          |                                   |  |
| H                      |      | 4.78            | 26.96    | 27.05                     |          |          |                                   |  |
| H                      |      | 2.99            | 29.83    | 29.21                     |          |          |                                   |  |
| H                      |      | 2.17            | 29.28    | 30.25                     |          |          |                                   |  |
| H                      |      | 1.65            | 29.89    | 29.99                     |          |          |                                   |  |
| H                      |      | 1.54            | 30.51    | 30.60                     |          |          |                                   |  |
| H                      |      | 1.94            | 30.19    | 30.09                     |          |          |                                   |  |
| H                      |      | 1.15            | 30.52    | 30.55                     |          |          |                                   |  |
| H                      |      | 2.07            | 29.97    | 29.86                     |          |          |                                   |  |
| H                      |      | 2.71            | 29.64    | 29.97                     |          |          |                                   |  |
| H                      | x    | 6.12            | 25.86    | 25.86                     |          |          |                                   |  |
| H                      |      | 2.45            | 29.30    | 29.26                     |          |          |                                   |  |
| H                      |      | 2.8             | 28.88    | 28.88                     |          |          |                                   |  |
| H                      | x    | 6.18            | 25.18    | 25.28                     |          |          |                                   |  |
| H                      | x    | 7.31            | 24.16    | 24.20                     |          |          |                                   |  |
| H                      |      | 1.87            | 30.03    | 30.09                     |          |          |                                   |  |
| H                      |      | 0.89            | 30.54    | 30.84                     |          |          |                                   |  |
| H                      |      | 1.04            | 30.79    | 30.96                     |          |          |                                   |  |
| H                      |      | 2.13            | 29.54    | 29.77                     |          |          |                                   |  |
| H                      |      | 1.93            | 29.86    | 29.58                     |          |          |                                   |  |
| H                      |      | 4.04            | 27.19    | 27.49                     |          |          |                                   |  |

| Functional<br>mPW1PW91 | Solvent?<br>PCM |          | Basis Set<br>6-311+G(d,p) |          | Type of Data<br>Shielding Tensors |          |
|------------------------|-----------------|----------|---------------------------|----------|-----------------------------------|----------|
|                        | Isomer 1        | Isomer 2 | Isomer 3                  | Isomer 4 | Isomer 5                          | Isomer 6 |
| sDP4+ (H data)         | 30.14%          | 69.86%   | -                         | -        | -                                 | -        |
| sDP4+ (C data)         | 0.00%           | 00.00%   | -                         | -        | -                                 | -        |
| sDP4+ (all data)       | 0.00%           | 00.00%   | -                         | -        | -                                 | -        |
| uDP4+ (H data)         | 2.96%           | 97.04%   | -                         | -        | -                                 | -        |
| uDP4+ (C data)         | 0.01%           | 99.99%   | -                         | -        | -                                 | -        |
| uDP4+ (all data)       | 0.00%           | 00.00%   | -                         | -        | -                                 | -        |
| DP4+ (H data)          | 1.30%           | 98.70%   | -                         | -        | -                                 | -        |
| DP4+ (C data)          | 0.00%           | 00.00%   | -                         | -        | -                                 | -        |
| DP4+ (all data)        | 0.00%           | 00.00%   | -                         | -        | -                                 | -        |

**Figure S1.** Regression analysis of experimental vs calculated NMR data of **1a** and **1b**

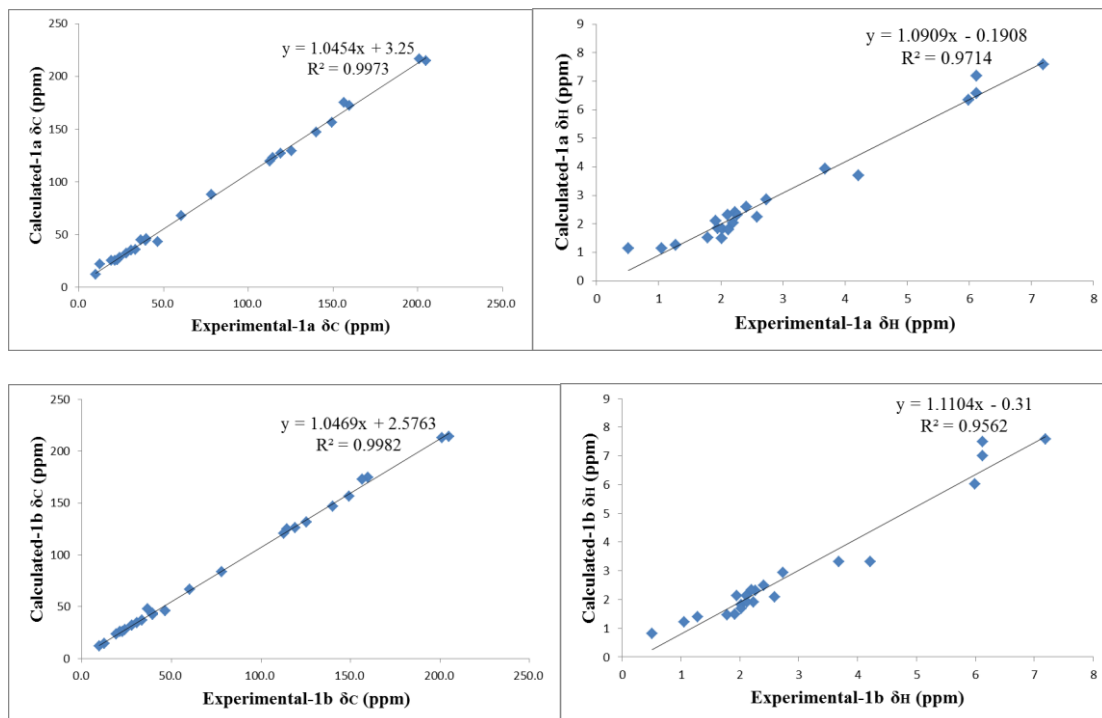

**Figure S2.** Regression analysis of experimental vs calculated NMR data of **2a** and **2b**

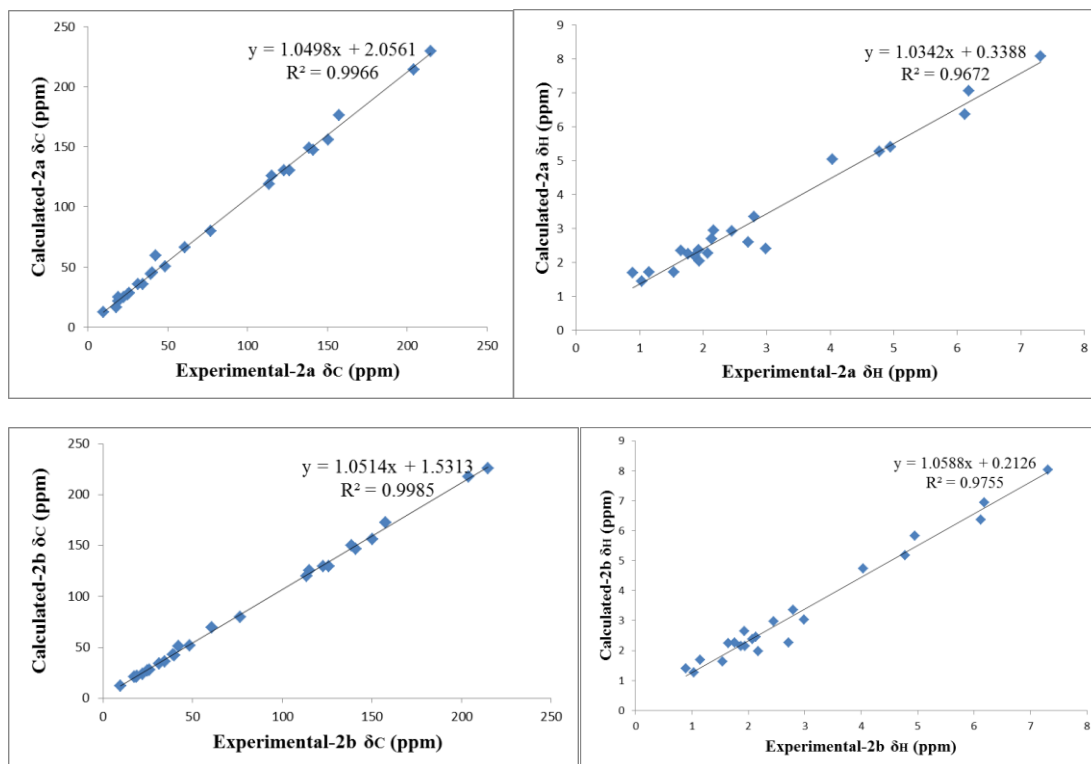

**Figure S3.** HRESIMS of compound **1**

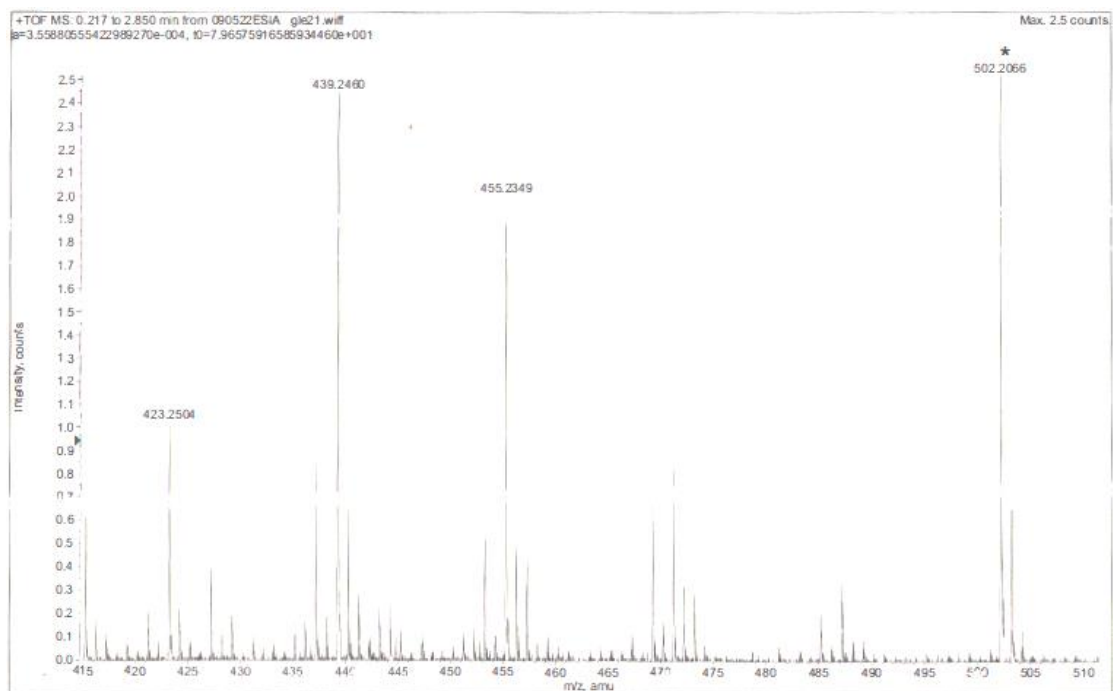

**Figure S4.** IR spectrum of compound **1**

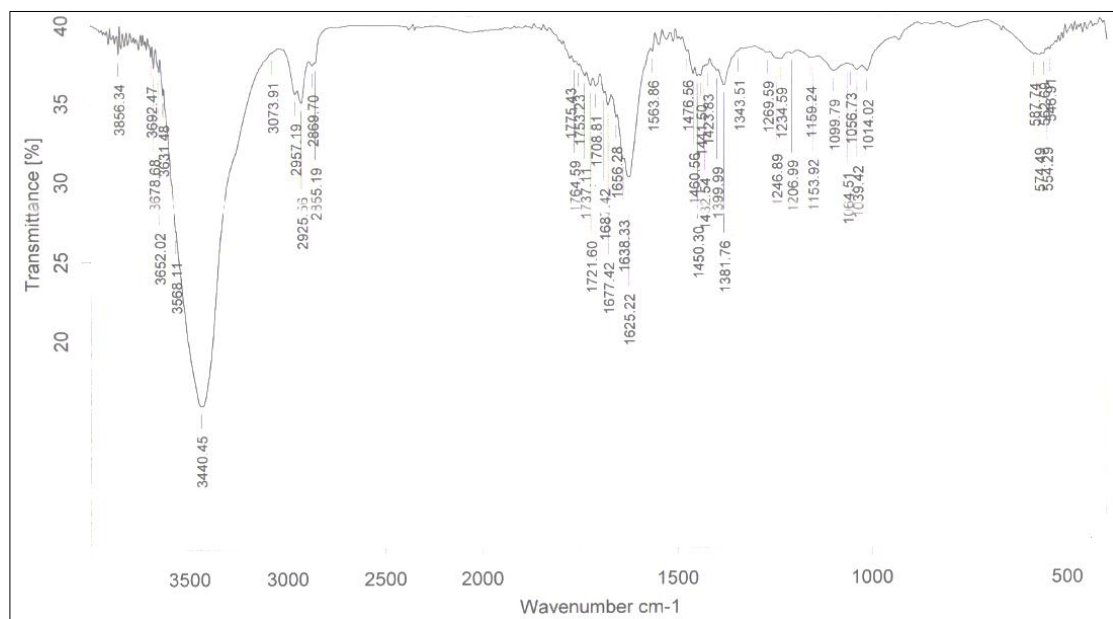



**Figure S5.**  $^1\text{H}$  NMR spectrum of compound **1** in  $\text{CDCl}_3$  (400 MHz)

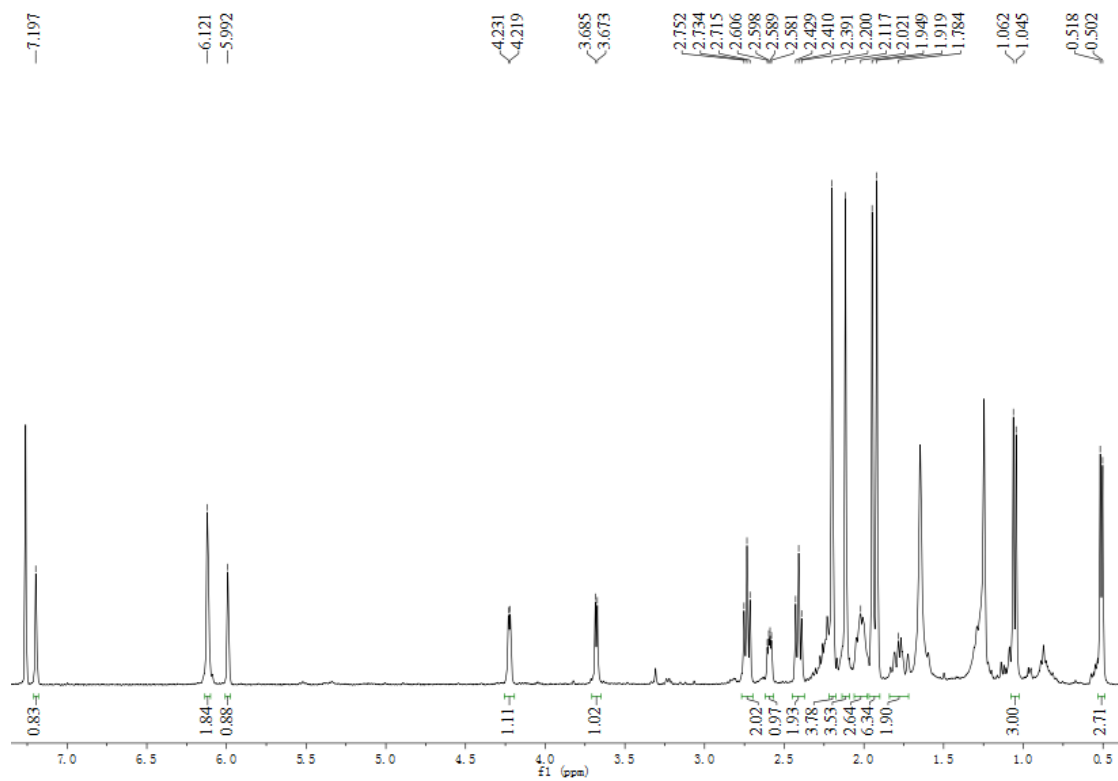

**Figure S6.** Expanded  $^1\text{H}$  NMR spectrum of compound **1**

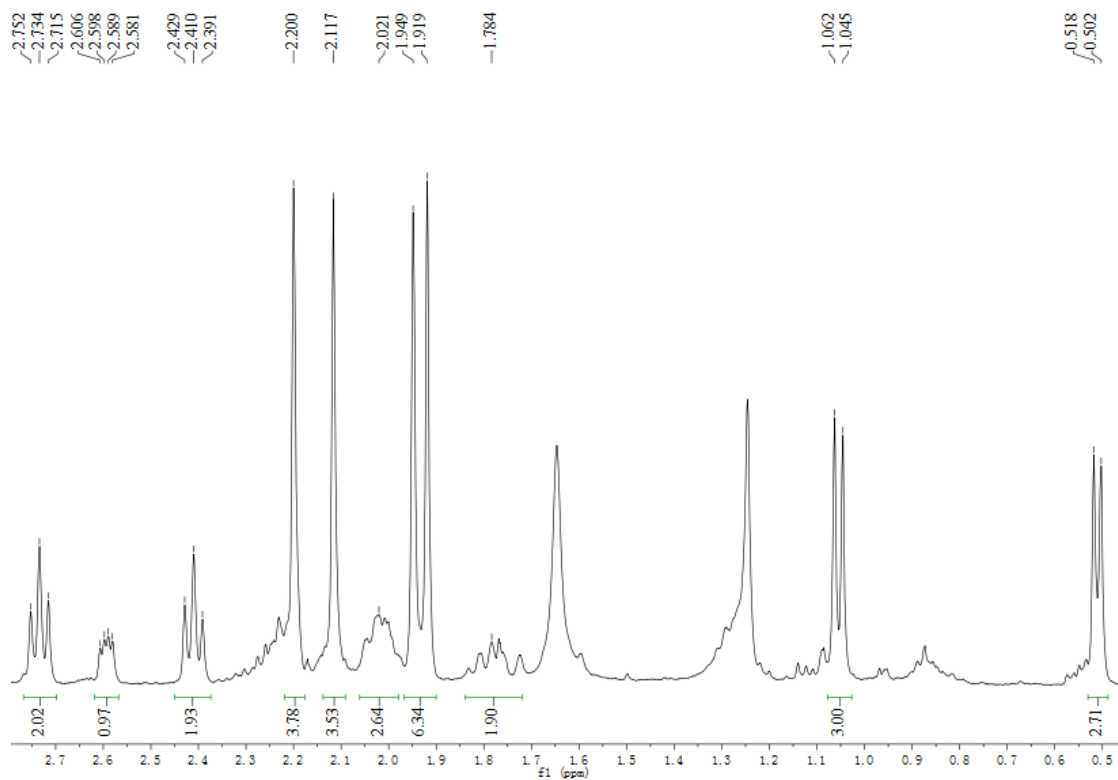

**Figure S7.**  $^{13}\text{C}$  NMR (DEPT) spectrum of compound **1** in  $\text{CDCl}_3$  (100 MHz)

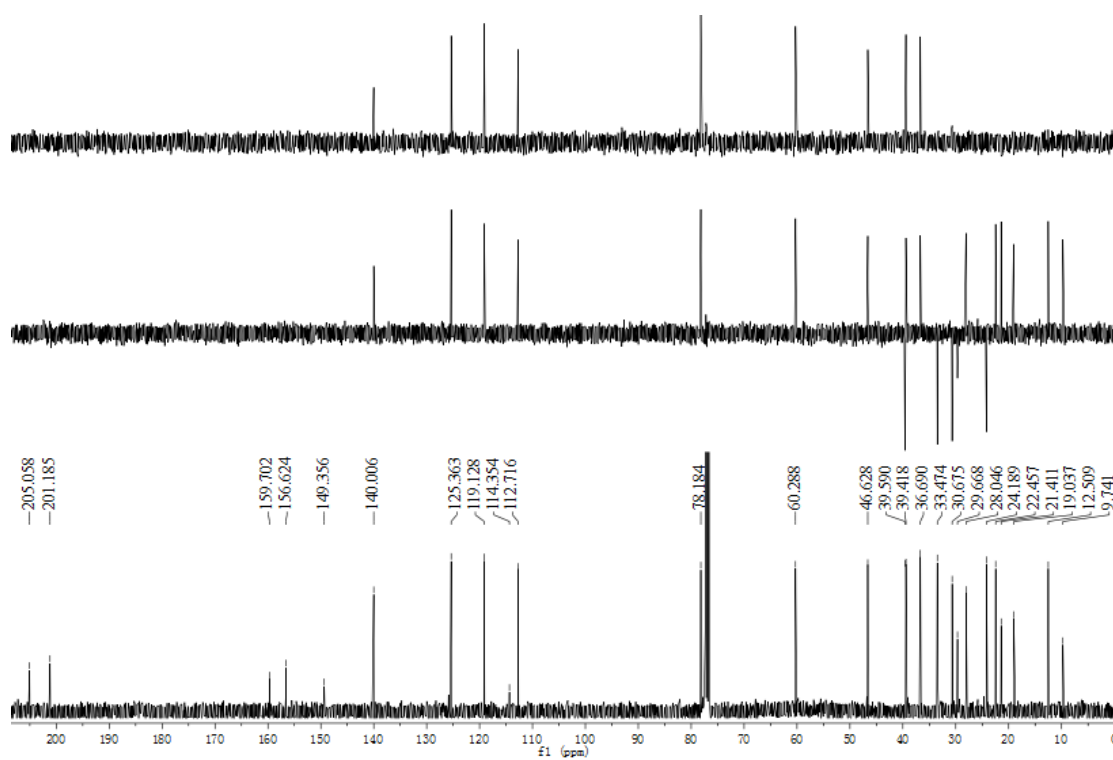

**Figure S8.** Expanded  $^{13}\text{C}$  NMR (DEPT) spectrum of compound **1**

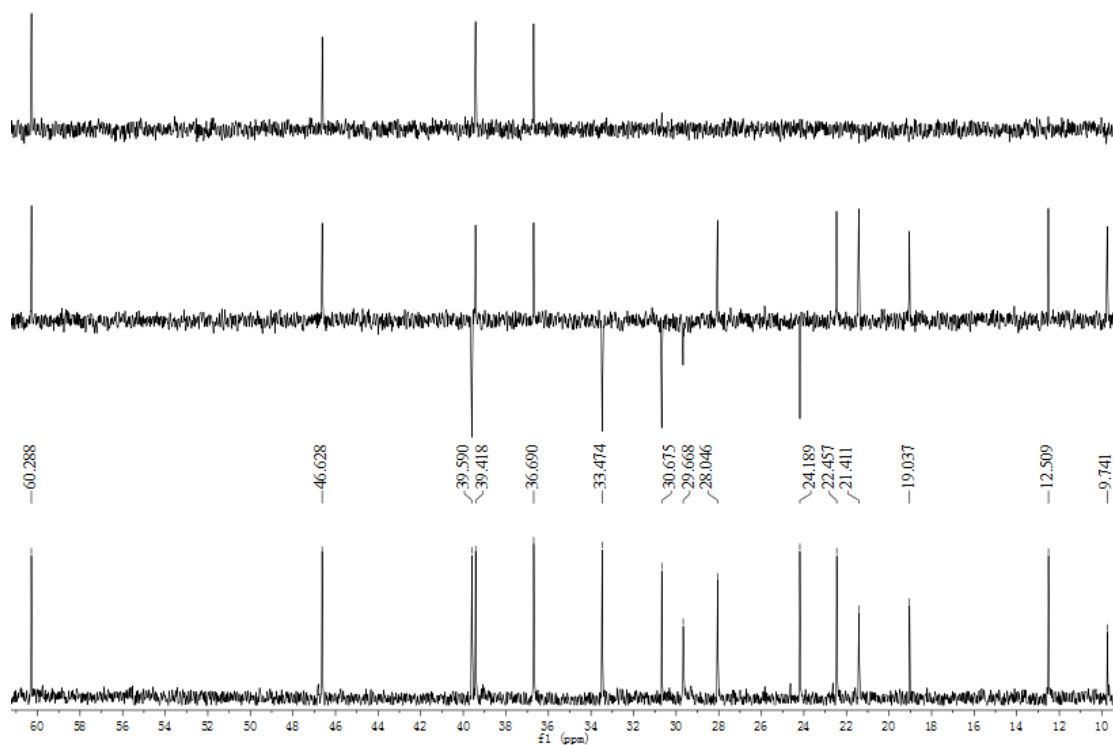

**Figure S9.**  $^1\text{H}$ - $^1\text{H}$  COSY spectrum of compound **1** in  $\text{CDCl}_3$

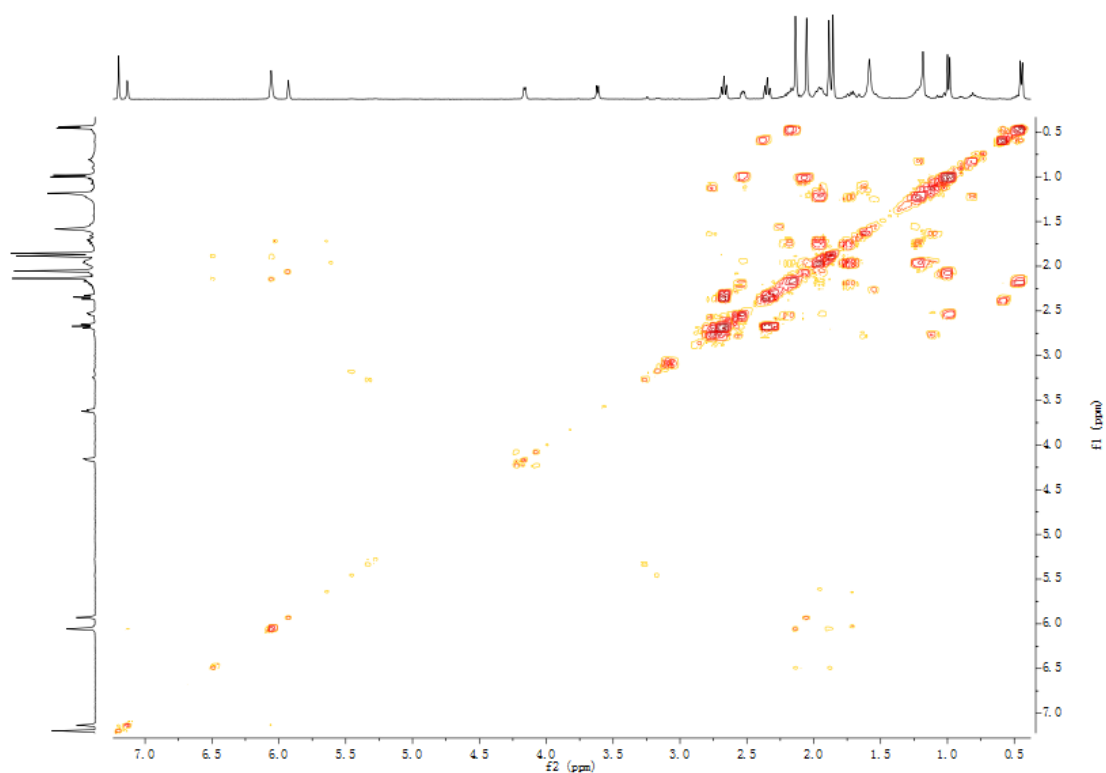

**Figure S10.** Expanded  $^1\text{H}$ - $^1\text{H}$  COSY spectrum of compound **1**

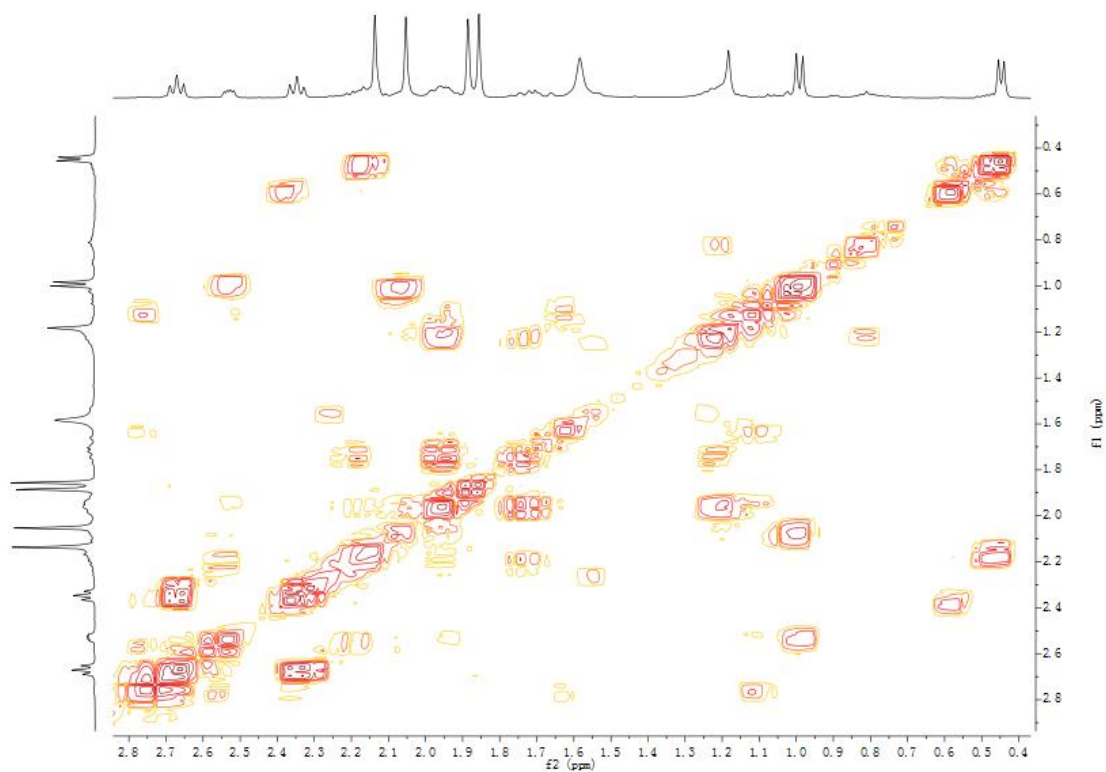

**Figure S11.** HSQC spectrum of compound **1** in CDCl<sub>3</sub>

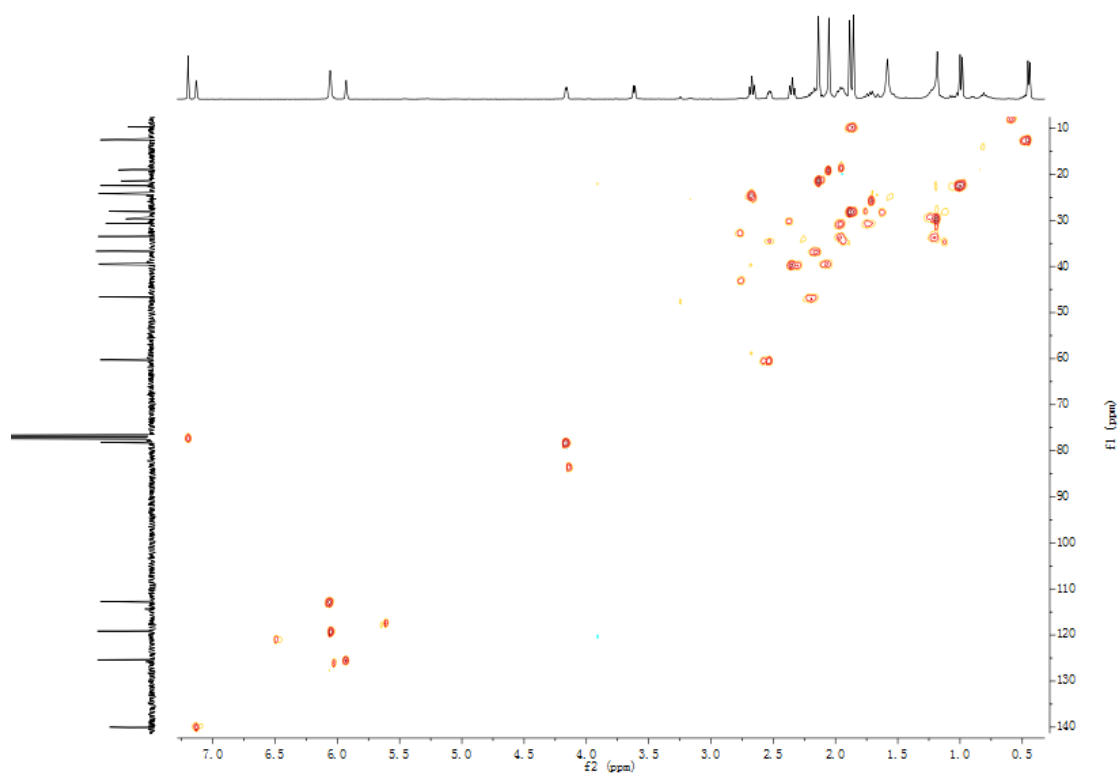

**Figure S12.** Expanded HSQC spectrum of compound **1**

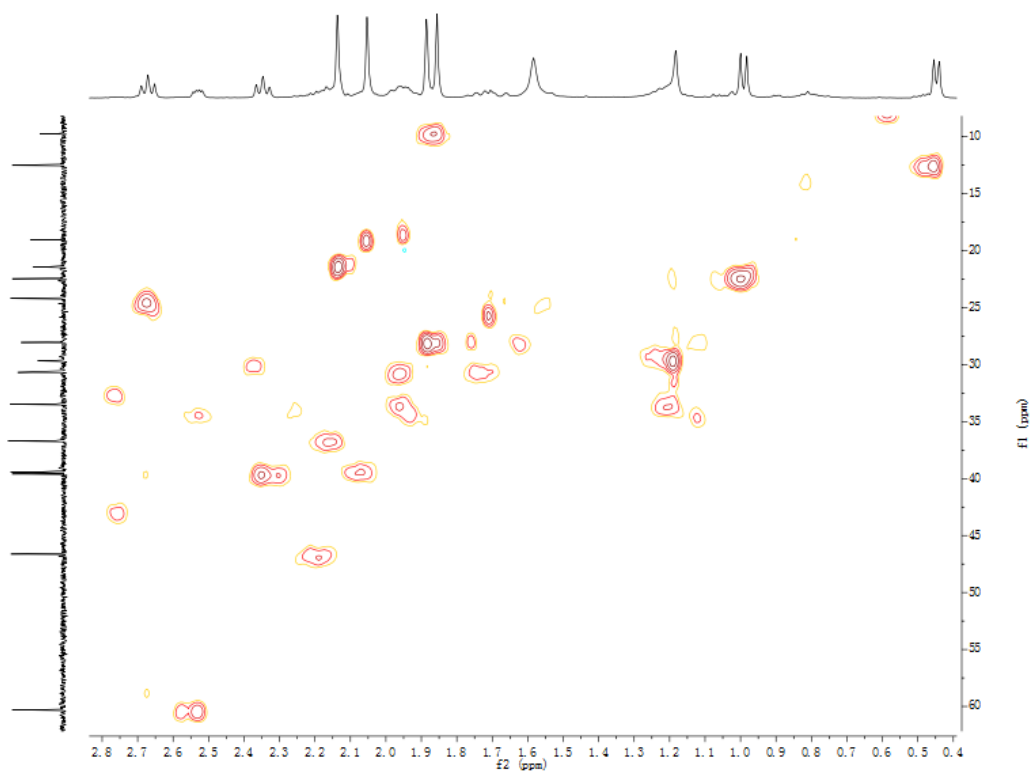

**Figure S13.** HMBC spectrum of compound **1** in CDCl<sub>3</sub>

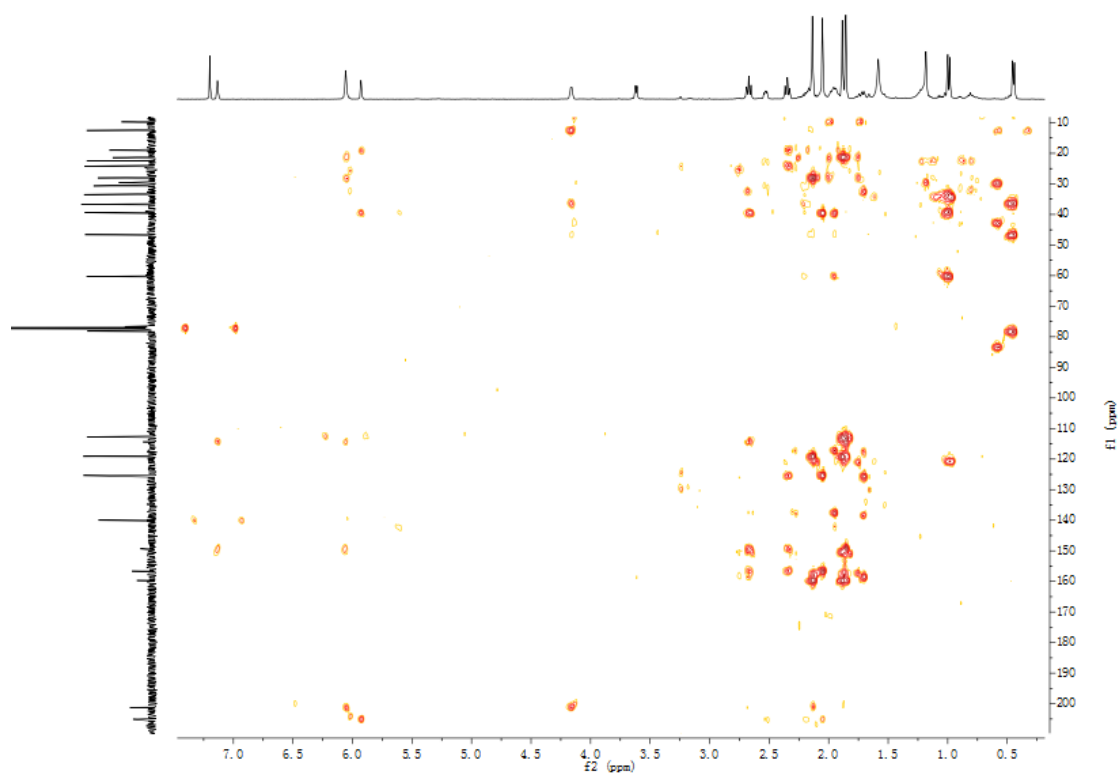

**Figure S14.** Expanded HMBC spectrum of compound **1**

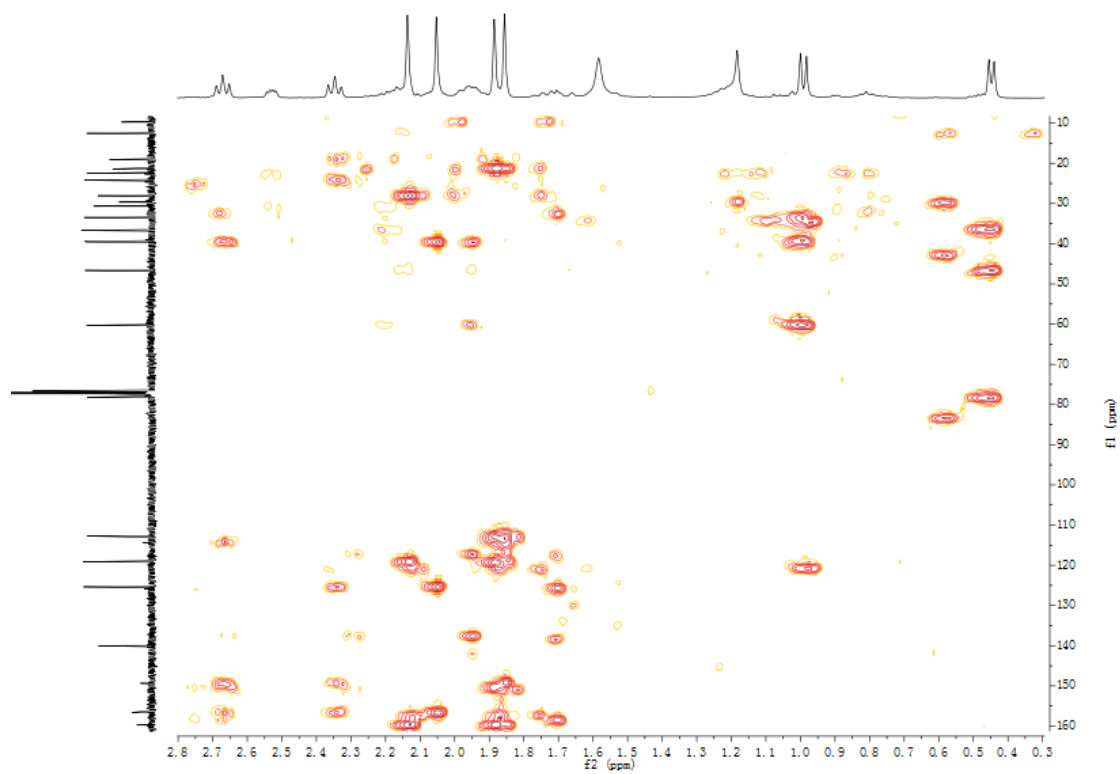

**Figure S15.** ROESY spectrum of compound **1** in CDCl<sub>3</sub>

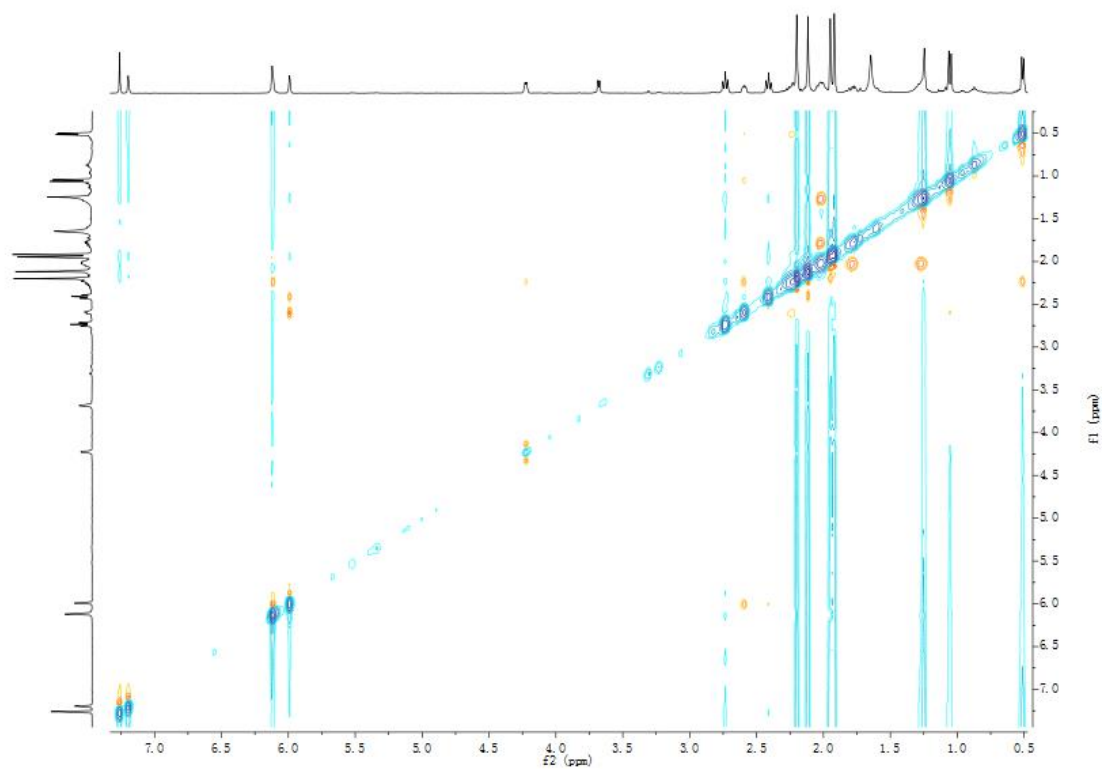

**Figure S16.** Expanded ROESY spectrum of compound **1**

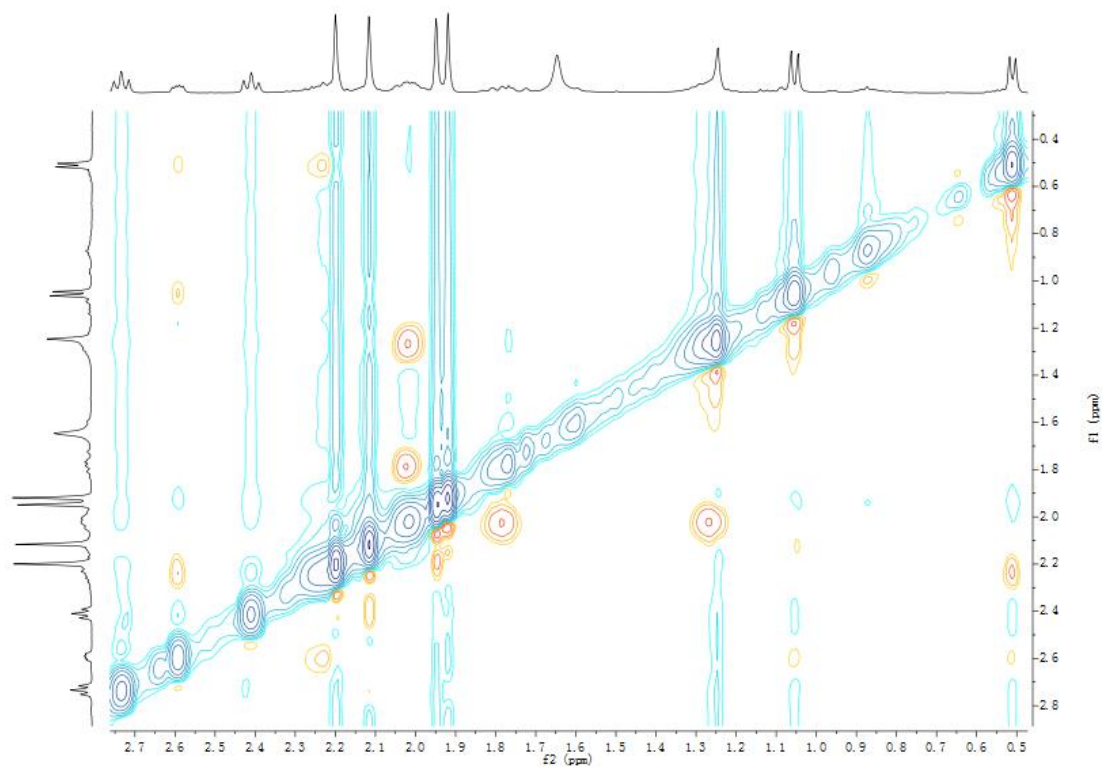

Figure S17. HRESIMS of compound 2

### Qualitative Analysis Report

|                               |                             |                      |                      |
|-------------------------------|-----------------------------|----------------------|----------------------|
| <b>Data Filename</b>          | 180102ESIA11.d              | <b>Sample Name</b>   | glm-3-1a             |
| <b>Sample Type</b>            | Sample                      | <b>Position</b>      |                      |
| <b>Instrument Name</b>        | Agilent G6230 TOF MS        | <b>User Name</b>     | KIB                  |
| <b>Acq Method</b>             | ESI.m                       | <b>Acquired Time</b> | 1/2/2018 11:37:11 AM |
| <b>IRM Calibration Status</b> | Success                     | <b>DA Method</b>     | ESI.m                |
| <b>Comment</b>                |                             |                      |                      |
| <b>Sample Group</b>           |                             | <b>Info.</b>         |                      |
| <b>Acquisition SW</b>         | 6200 series TOF/6500 series |                      |                      |
| <b>Version</b>                | Q-TOF B.05.01 (B5125.2)     |                      |                      |

#### User Spectra

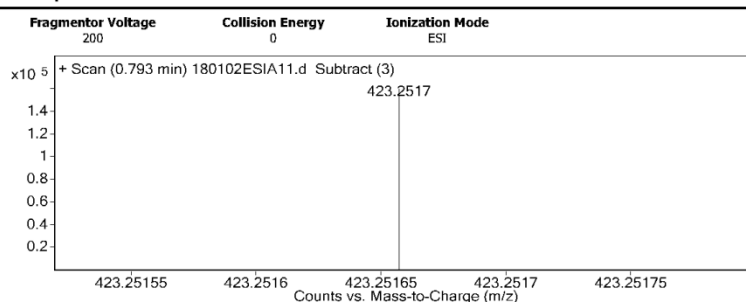

#### Peak List

| m/z      | z | Abund     | Formula       | Ion |
|----------|---|-----------|---------------|-----|
| 423.2517 | 1 | 158881.97 | C25 H36 Na O4 | M+  |
| 424.2542 | 1 | 34520     | C25 H36 Na O4 | M+  |
| 439.2338 | 1 | 14621.36  |               |     |
| 455.2402 | 1 | 13544.43  |               |     |
| 823.5134 | 1 | 119152.66 |               |     |
| 824.5169 | 1 | 57281.3   |               |     |
| 837.4919 | 1 | 41421.52  |               |     |
| 838.4947 | 1 | 18775.66  |               |     |
| 839.5069 |   | 79884.73  |               |     |
| 840.5102 | 1 | 34274.27  |               |     |

#### Formula Calculator Element Limits

| Element | Min | Max |
|---------|-----|-----|
| C       | 0   | 200 |
| H       | 0   | 400 |
| O       | 0   | 10  |
| Na      | 1   | 1   |

#### Formula Calculator Results

| Formula       | CalculatedMass | Mz       | Diff.(mDa) | Diff. (ppm) | DBE |
|---------------|----------------|----------|------------|-------------|-----|
| C25 H36 Na O4 | 423.2511       | 423.2517 | -0.6       | 1.3         | 7.5 |

--- End Of Report ---

**Figure S18.** IR spectrum of compound **2**

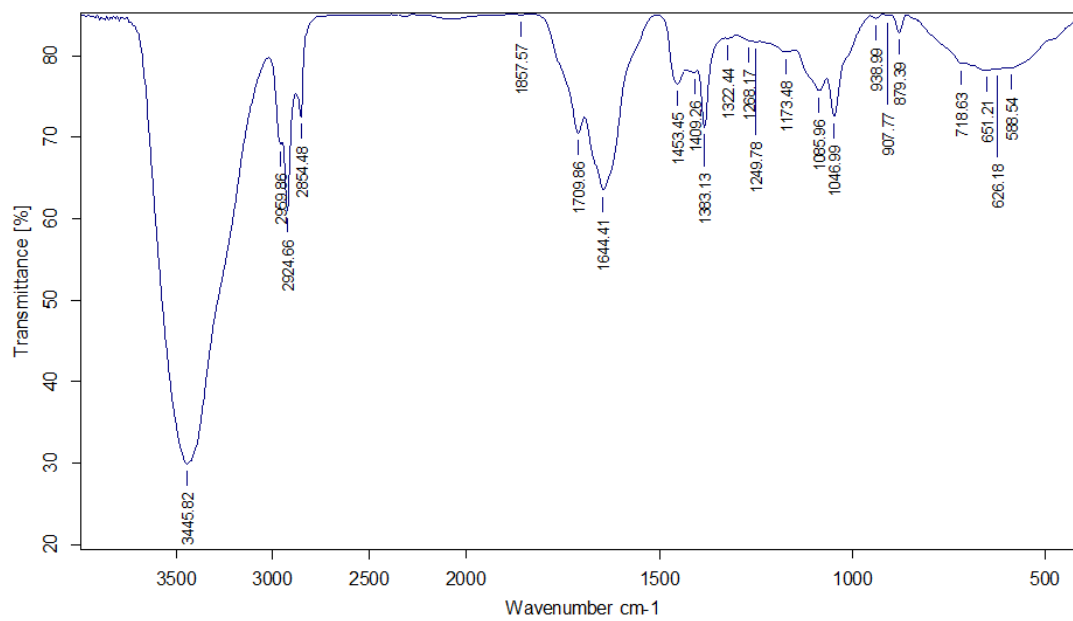



**Figure S19.**  $^1\text{H}$  NMR spectrum of compound **2** in acetone- $d_6$  (800 MHz)

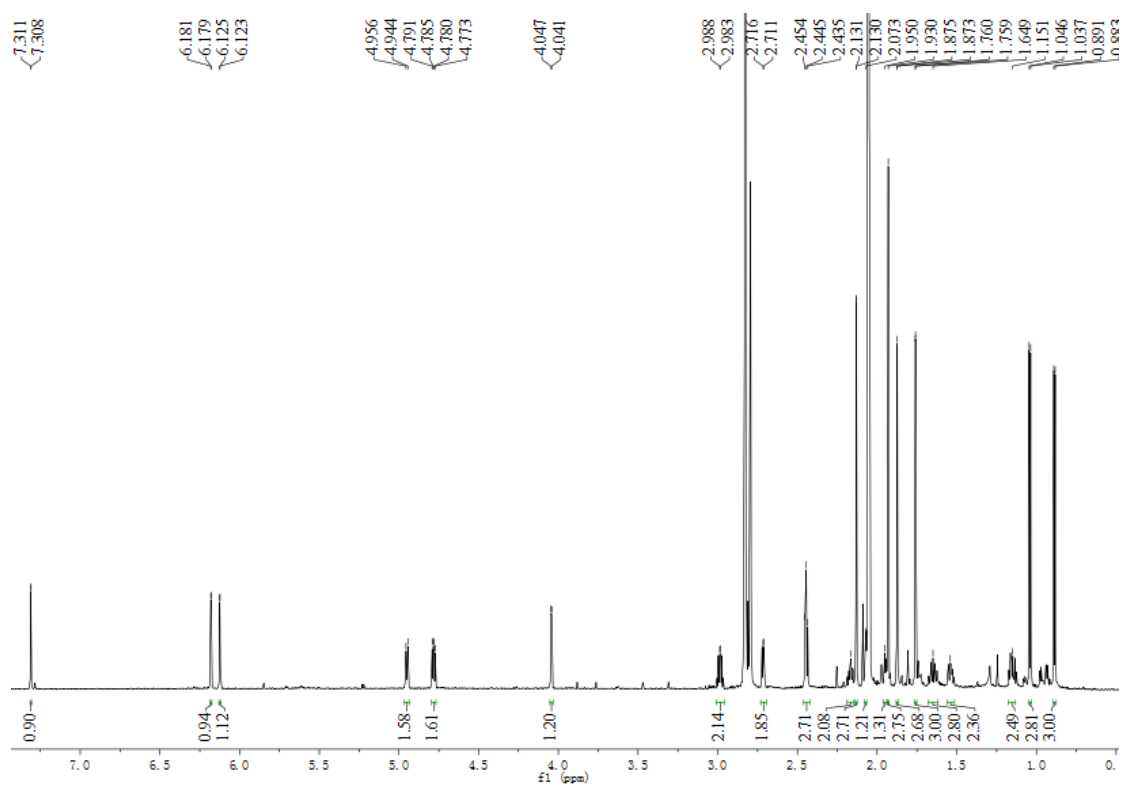

**Figure S20.** Expanded  $^1\text{H}$  NMR spectrum of compound **2**

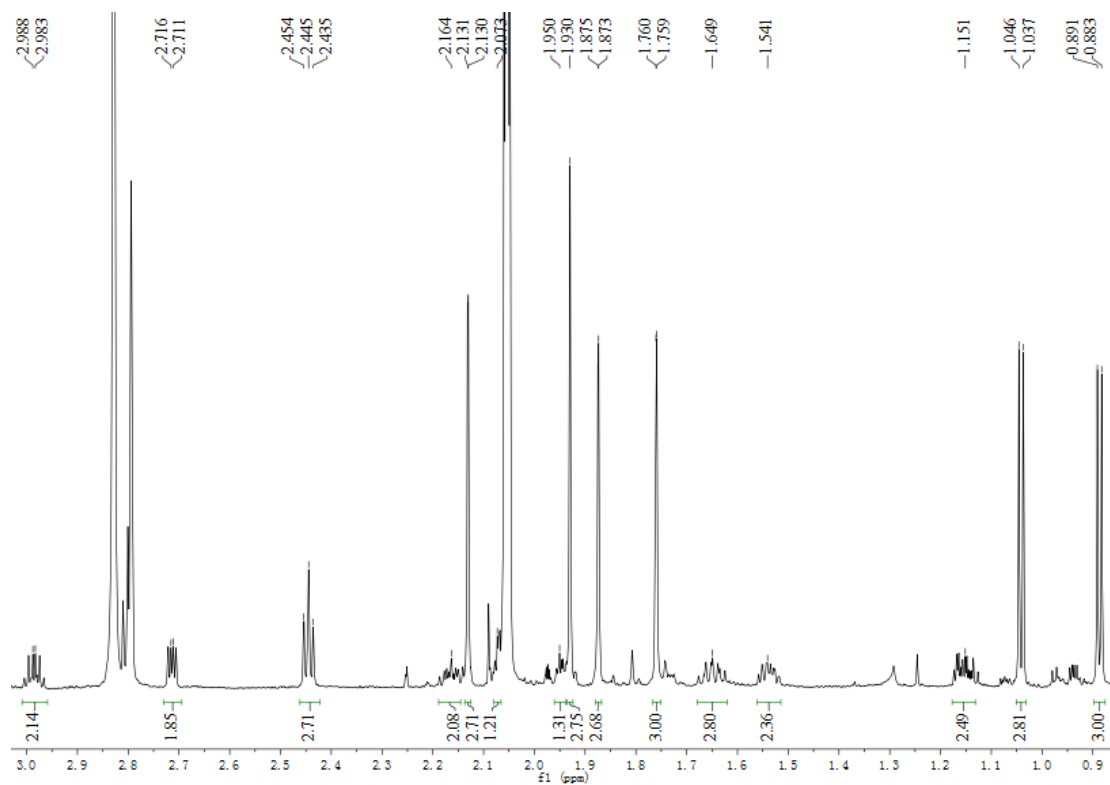

**Figure S21.**  $^{13}\text{C}$  NMR (DEPT) spectrum of compound **2** in acetone- $d_6$  (200 MHz)

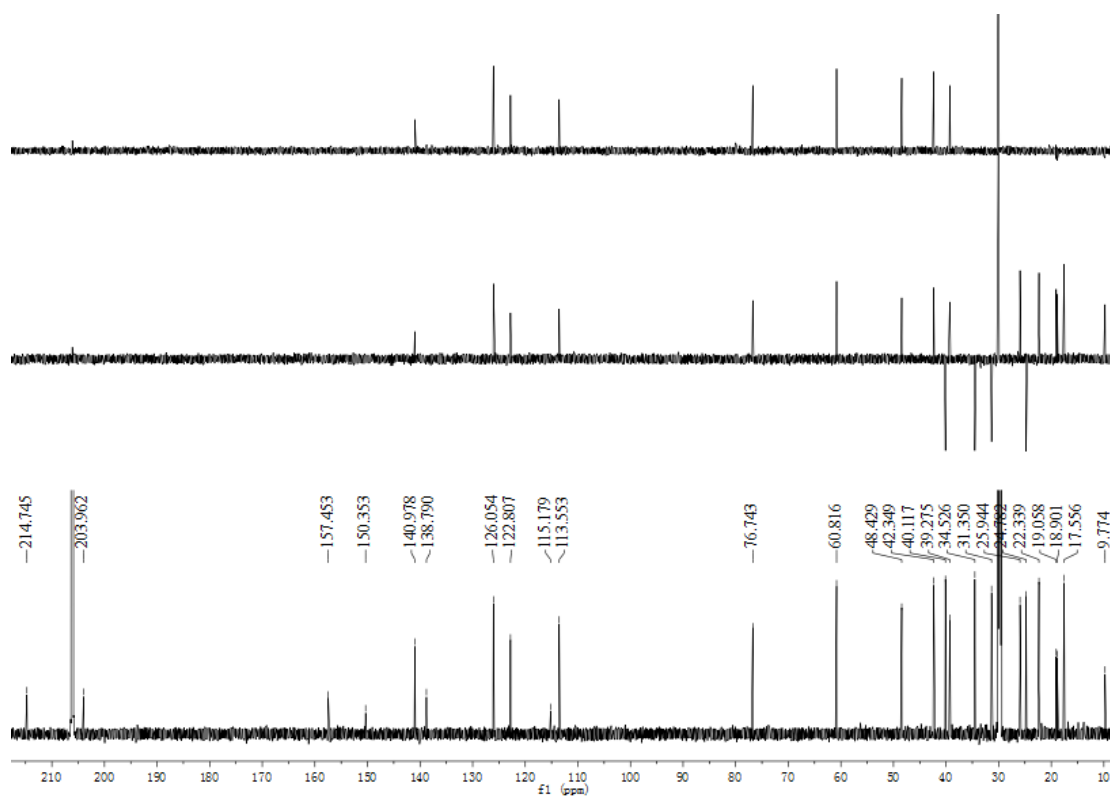

**Figure S22.** Expanded  $^{13}\text{C}$  NMR (DEPT) spectrum of compound **2**

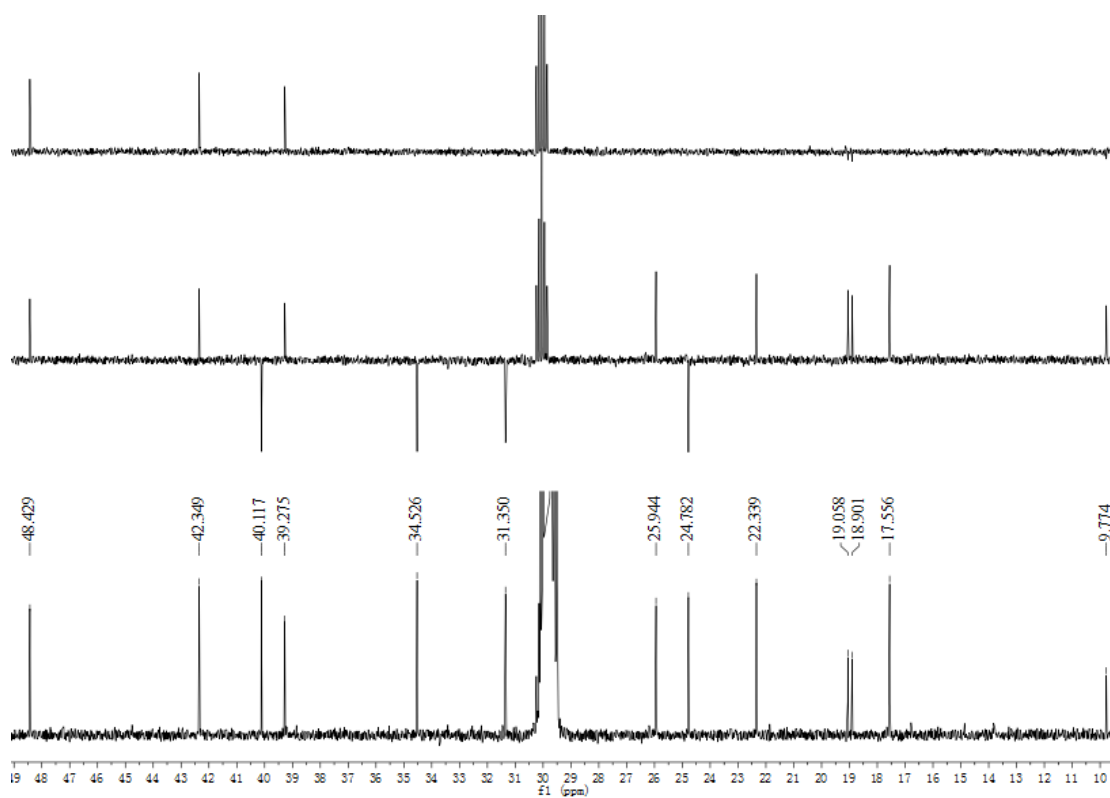

**Figure S23.**  $^1\text{H}$ - $^1\text{H}$  COSY spectrum of compound **2** in acetone- $d_6$

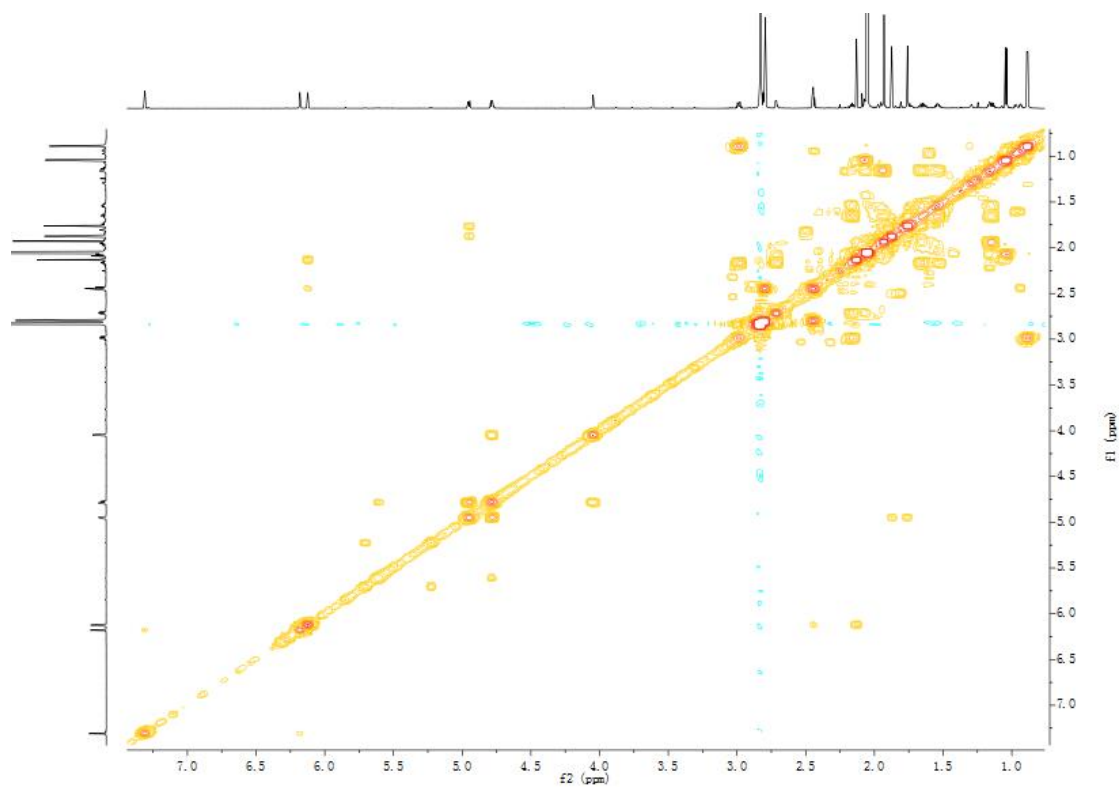

**Figure S24.** Expanded  $^1\text{H}$ - $^1\text{H}$  COSY spectrum of compound **2**

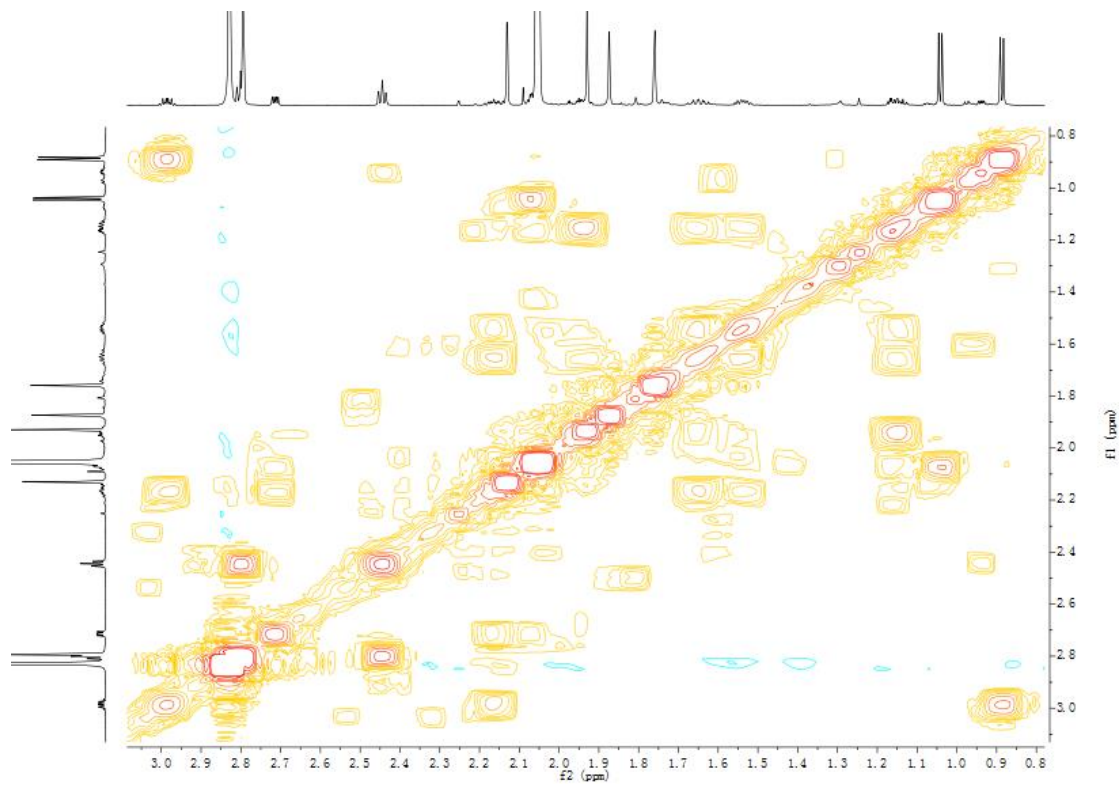

**Figure S25.** HSQC spectrum of compound **2** in acetone- $d_6$

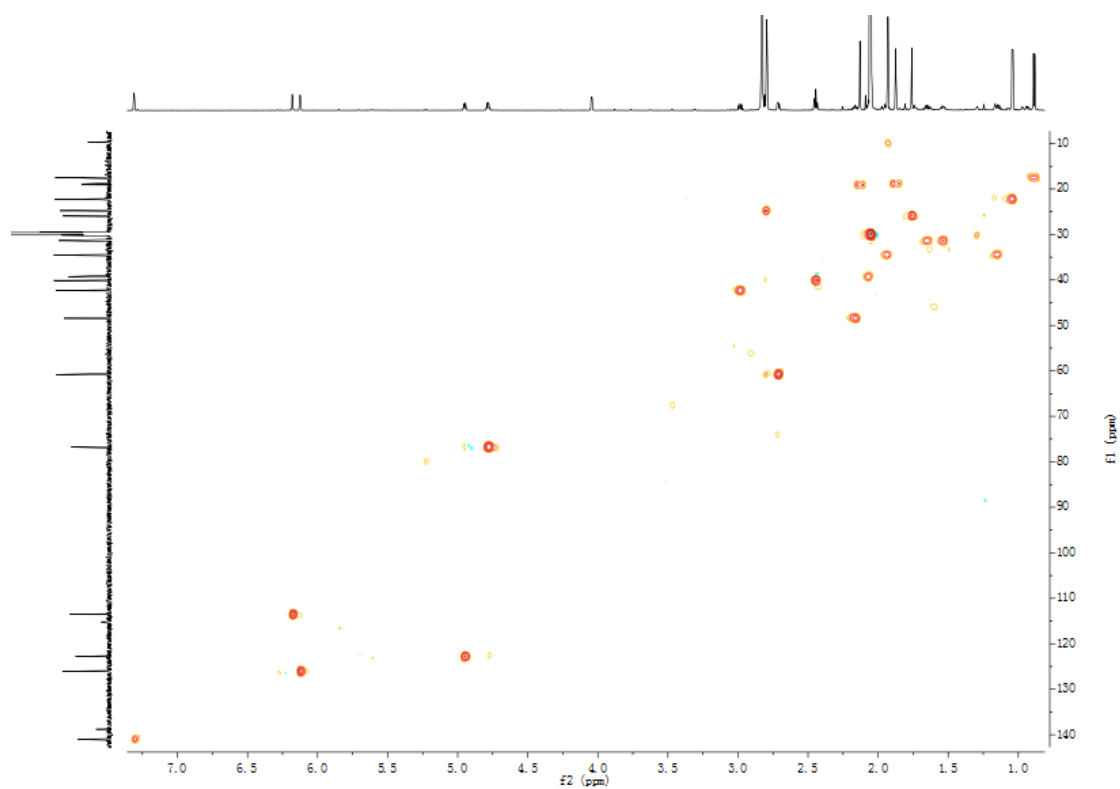

**Figure S26.** Expanded HSQC spectrum of compound **2**

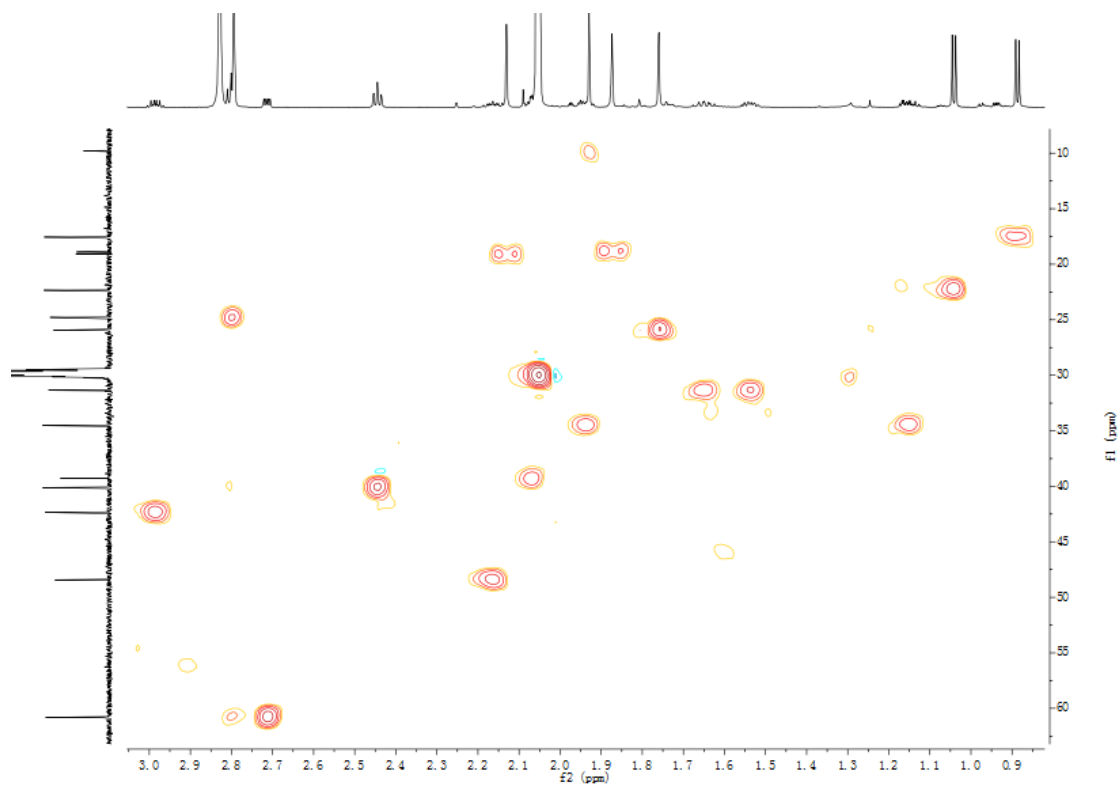

**Figure S27.** HMBC spectrum of compound **2** in acetone- $d_6$

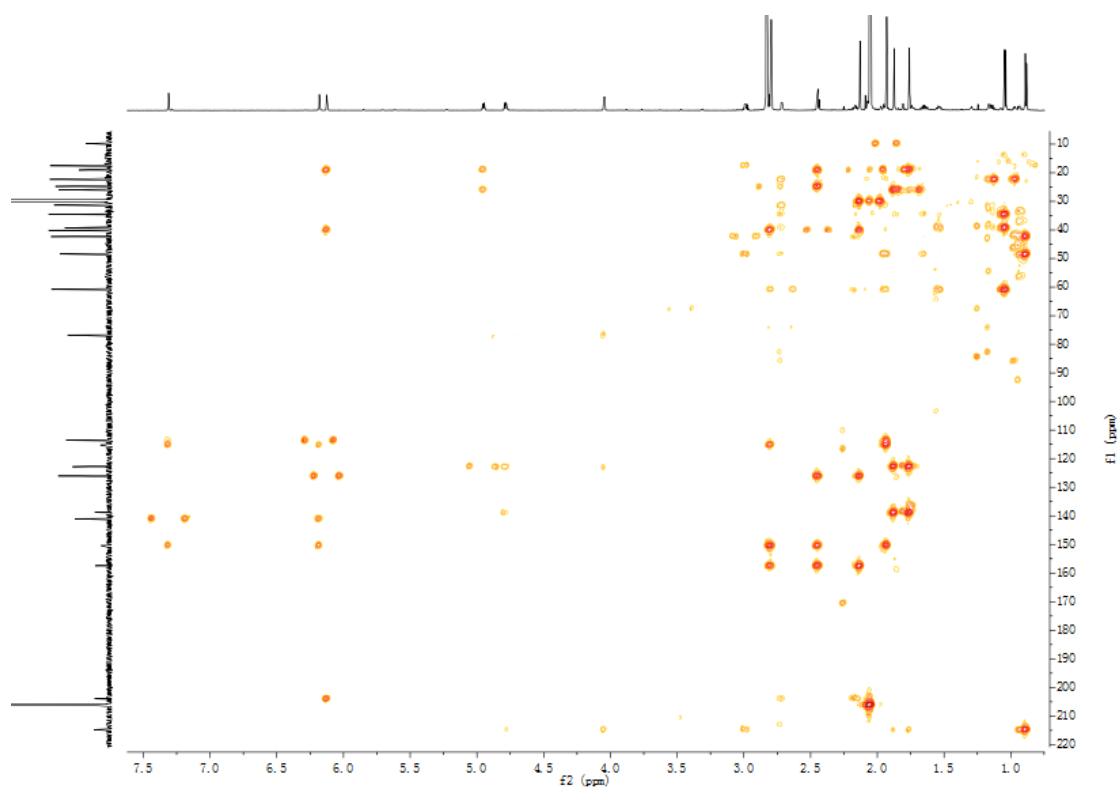

**Figure S28.** Expanded HMBC spectrum of compound **2**

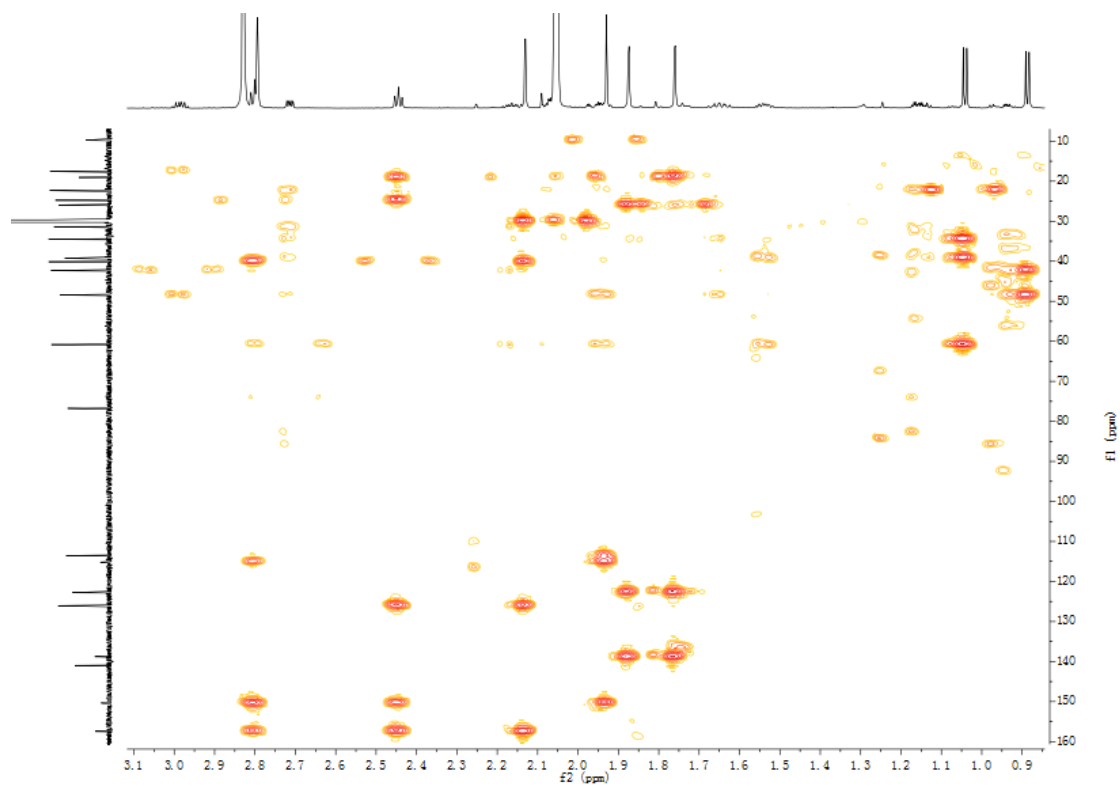

**Figure S29.** ROESY spectrum of compound **2** in acetone- $d_6$

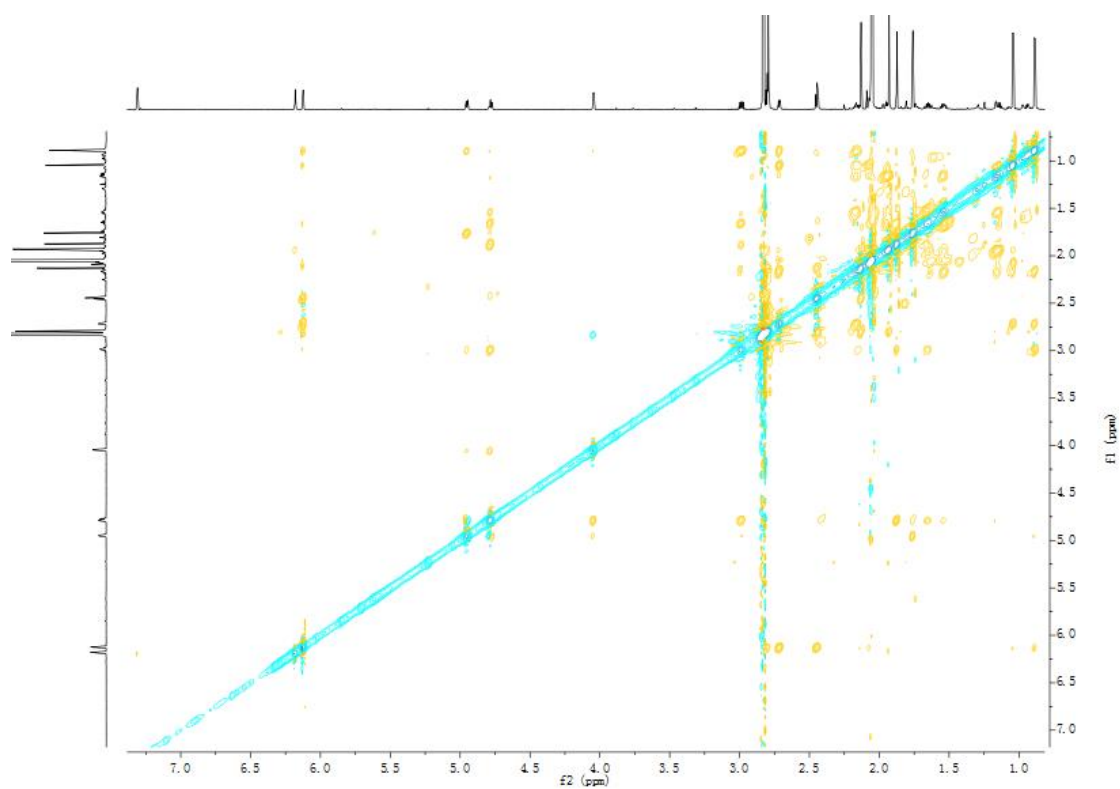

**Figure S30.** Expanded ROESY spectrum of compound **2**

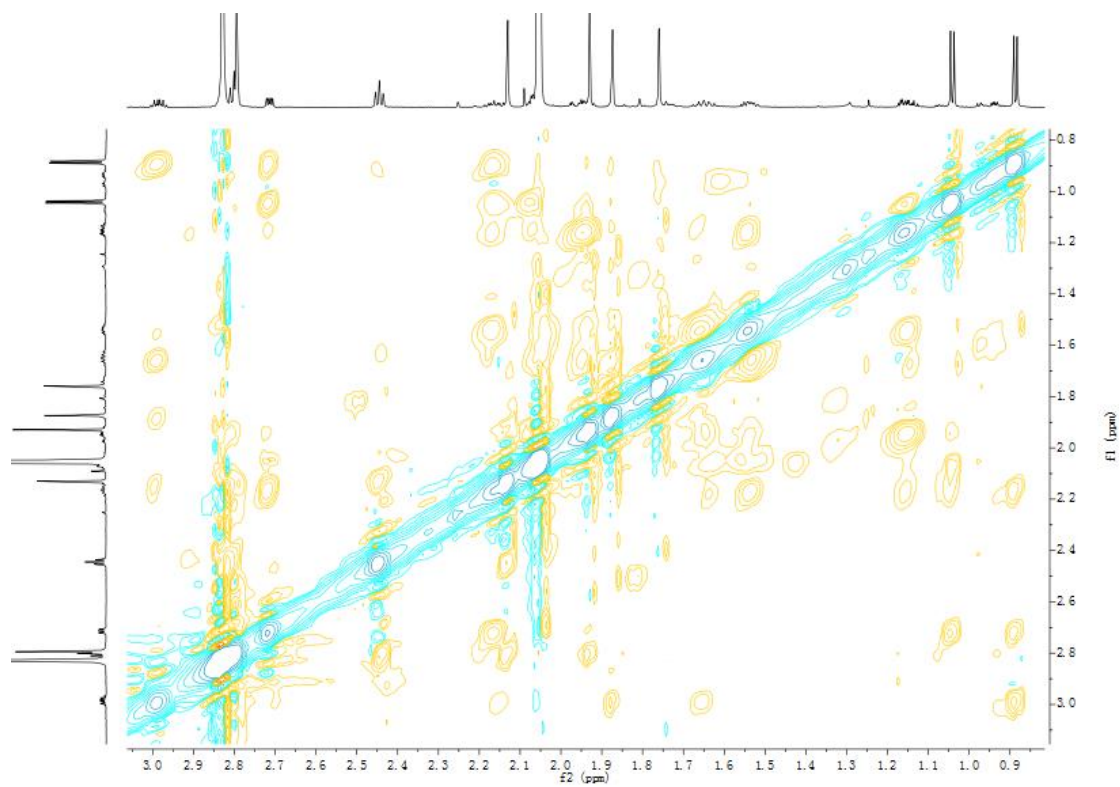

Supplement: d2qo00138a1.pdf [file d2qo00138a1.pdf]
